# Supplementary material for: Barriers and Delays in Tuberculosis Diagnosis and Treatment Services: Does Gender Matter?
Source: Hindawi journal article supplement (doi:10.1155/2014/461935), 2014-01-01
Supplement: f1 [file 461935.f1.zip]

### TableS2.Quality assessment of included studies

[illegible]

### TableS2.Quality assessment of included studies

[illegible]





### TableS2.Quality assessment of included studies

[illegible]

**TableS2.Quality assessment of included studies**

**Legend:**

- criteria met;
- criteria not met/unclear/not reported;
- criteria not applicable

STROBE checklist: Vandembroucke JP, von Elm E, Altman DG, Gotzsche PC, Mulrow CD, et al. (2007) Strengthening the Reporting of Observational Studies in Epidemiology (STROBE): explanation and elaboration. PLoS Med 4: e297.

CONSORT checklist for clustered randomized trial: Campbell MK, Elbourne DR, Altman DG (2004) CONSORT statement: extension to cluster randomised trials. BMJ 328: 702-708.

CONSORT checklist for pragmatic randomized clinical trial: Zwarenstein M, Treweek S, Gagnier JJ, Altman DG, Tunis S et al. (2008) Improving the reporting of pragmatic trials: an extension of the CONSORT statement. BMJ 337:a2390. doi: 10.1136/bmj.a2390
