# Supplementary material for: Barriers and Delays in Tuberculosis Diagnosis and Treatment Services: Does Gender Matter?
Source: Hindawi journal article supplement (doi:10.1155/2014/461935), 2014-01-01
Supplement: f1 [file 461935.f1.zip]

**Table S6. Summary of degree of urbanization by outcome type**

| Outcome Type                                             | Gender difference n (%)                            |                                              | No gender difference n (%)                           |
|----------------------------------------------------------|----------------------------------------------------|----------------------------------------------|------------------------------------------------------|
|                                                          | Women > Men                                        | Men > Women                                  |                                                      |
| Individual-level barriers                                |                                                    |                                              |                                                      |
| Financial                                                | U – 4 (36%); R – 2 (18%); M – 2 (18%); N – 3 (27%) | U – 1 (20%); R – 2 (40%); M – 2 (40%)        | U – 1 (17%); R – 2 (33%); M – 3 (50%)                |
| Physical                                                 | U – 1 (100%)                                       |                                              | U – 2 (25%); R – 2 (25%) ; M – 3 (38%) ; O – 1 (13%) |
| Stigma                                                   | U – 1 (9%); R – 4 ( 36%); M – 5 (45%); N – 1 (9%)  | U – 2 (100%)                                 | U – 3 (25%); R – 3 (25%); M – 3 (25%); N – 3 (25%)   |
| Health Literacy                                          | U – 3 (18%); R – 8 (47%); M – 5 (29%); O – 1 (6%)  | U – 1 (13%); M – 6 (75%); N – 1 (13%)        | U – 9 (38%); R – 2 (8%); M – 8 (33%); N – 5 (20%)    |
| Socio-demographic                                        | R – 1 (25%); M – 3 (75%)                           |                                              | M – 2 (100%)                                         |
| Provider/system- level barriers                          | U – 2 (25%); R – 1 (13%); M – 5 (63%)              |                                              | U – 5 (45%); R – 1 (9%); M – 4 (36%); O – 1 (9%)     |
| Combined individual, provider, and system-level barriers | U – 1 (20%); R – 3 (60%); M – 1 (20%)              | M – 1 (100%)                                 | R – 1 (100%)                                         |
| Individual-level delay                                   | U – 4 (31%); R – 1 (8%); M – 7 (54%); N – 1 (8%)   | U – 1 (14%); R – (14%); M – 3 (43%); N – 29% | U – 7 (18%); R – 9 (24%); M – 13 (34%); N – 9 (24%)  |
| Provider/system-level delay                              | U – 3 (27%); R – 2 (18%); M – 4 (36%); N – 2 (18%) | U – 1 (50%); M – 1 (50%)                     | U – 4 (17%); R – 4 (17%); M – 11 (46%); N – 5 (21%)  |
| Combined individual, provider, and system-level delay    | U – 2 (22%); R – 1 (11%); M – 6 (66%)              | M – 1 (100%)                                 | U – 4 (24%); R – 1 (6%); M – 8 (47%); N – 4 (24%)    |

Degree of urbanization: U – Urban; R – Rural; M – Mixed; N – Unknown; O – Other.
