# Supplementary material for: Barriers and Delays in Tuberculosis Diagnosis and Treatment Services: Does Gender Matter?
Source: Hindawi journal article supplement (doi:10.1155/2014/461935), 2014-01-01
Supplement: f1 [file 461935.f1.zip]

**Table S5. Summary of study population by outcome type**

| Outcome Type                                             | Gender difference n (%)                            |                                       | No gender difference n (%)                         |
|----------------------------------------------------------|----------------------------------------------------|---------------------------------------|----------------------------------------------------|
|                                                          | Women > Men                                        | Men > Women                           |                                                    |
| Individual-level barriers                                |                                                    |                                       |                                                    |
| Financial                                                | C – 10 (91%); S – 1 (9%)                           | C-3 (60%); G – 2 (40%)                | C – 3 (50%); S – 1 (17%); G – 1 (17%); M – 1 (17%) |
| Physical                                                 | C – 1 (100%)                                       |                                       | C -6 (75%); G – 2 (25%)                            |
| Stigma                                                   | C – 7 (64%); G – 4 (36%)                           | S – 1 (50%); G – 1 (50%)              | C – 5 (42%); G – 6 (50%); M – 1 (8%)               |
| Health Literacy                                          | C – 4 (24%); S – 2 (12%); G – 10 (59%); M – 1 (6%) | C – 4 (50%); G – 3 (38%); M – 1 (12%) | C – 13 (54%); S – 1 (4%); G – 8 (33%); M – 2 (8%)  |
| Socio-demographic                                        | C – 4 (100%)                                       |                                       | C – 2 (100)                                        |
| Provider/system- level barriers                          | C – 7 (88%); G – 1 (12%)                           |                                       | C – 7 (64%); G – 2 (18%); M – 2 (18%)              |
| Combined individual, provider, and system-level barriers | C – 1 (20%); G – 1 (20%); M – 3 (60%)              | C – 1 (100%)                          | C – 1 (100%)                                       |
| Individual-level delay                                   | C – 10 (77%); S – 2 (15%) ; M – 1 (8%)             | C – 7 (86%); S – 1 (14%)              | C – 33 (87%); S – 3 (8%); M – 2 (5%)               |
| Provider/system-level delay                              | C – 10 (91%); M – 1 (9%)                           | C – 2 (100%)                          | C – 24 (100%)                                      |
| Combined individual, provider, and system-level delay    | C – 9 (100%)                                       | C – 1 (100%)                          | C – 16 (94%); M – 1 (6%)                           |

Study population: C – Persons with diagnosed TB; S –Persons with suspected TB; G – General population; M – Multiple populations
