# Supplementary material for: Barriers and Delays in Tuberculosis Diagnosis and Treatment Services: Does Gender Matter?
Source: Hindawi journal article supplement (doi:10.1155/2014/461935), 2014-01-01
Supplement: f1 [file 461935.f1.zip]

**Table S4. Summary of WHO regional distribution by outcome type**

| Outcome Type                                             | Gender difference n (%)                                                                                             |                                                                                                 | No gender difference n (%)                                                                       |
|----------------------------------------------------------|---------------------------------------------------------------------------------------------------------------------|-------------------------------------------------------------------------------------------------|--------------------------------------------------------------------------------------------------|
|                                                          | Women > Men                                                                                                         | Men > Women                                                                                     |                                                                                                  |
| Individual-level barriers                                |                                                                                                                     |                                                                                                 |                                                                                                  |
| Financial                                                | AFRO – 5 (45%); EMRO – 2 (18%); SEARO – 3 (27%); WPRO – 1 (9%)                                                      | AFRO – 2 (40%); SEARO – 2 (40%); Multiple – 1 (20%)                                             | AFRO – 2 (33%); EMRO – 1 (16%); SEARO – 2 (33%); WPRO – 1 (16%)                                  |
| Physical                                                 | AFRO – 1 (100%)                                                                                                     |                                                                                                 | AFRO – 1 (13%); AMRO – 1 (13%); EMRO – 2 (25%); SEARO – 3 (38%); WPRO – 1 (13%)                  |
| Stigma                                                   | AFRO – 2 (18%); AMRO – 1 (9%); EURO – 1 (9%); EMRO – 1 (9%); SEARO – 5 (45%); WPRO – 1 (9%)                         | AFRO – 1 (50%); AMRO – 1 (50%)                                                                  | AFRO – 1 (8%); EURO – 1 (8%); EMRO – 2 (16%); SEARO – 4 (33%); WPRO – 3 (25%); Multiple – 1 (8%) |
| Health Literacy                                          | AFRO – 2 (12%); AMRO – 1 (6%); EMRO – 4 (24%); SEARO – 4 (24%); WPRO – 6 (35%)                                      | AFRO – 1 (13%); AMRO – 2 (25%); EURO – 1 (13%); SEARO – 3 (38%); Multiple – 1 (13%)             | AFRO – 9 (38%); AMRO – 4 (17%); EMRO – 4 (17%); SEARO – 4 (17%); WPRO – 3 (13%)                  |
| Socio-demographic                                        | WPRO – 1 (25%); SEARO – 3 (75%)                                                                                     |                                                                                                 | AFRO – 1 (50%); WPRO – 1 (50%)                                                                   |
| Provider/system- level barriers                          | AFRO – 2 (25%); AMRO – 1 (13%); EURO – 1 (13%); EMRO – 1 (13%); SEARO – 2 (25%); WPRO – 1 (13%)                     |                                                                                                 | AFRO – 3 (27%); AMRO – 1 (9%); EMRO – 3 (27%); SEARO – 3 (27%); WPRO – 1 (9%)                    |
| Combined individual, provider, and system-level barriers | AFRO – 2 (40%); AMRO – 1 (20%); SEARO – 1 (20%); WPRO – 1 (20%)                                                     | SEARO – 1 (100%)                                                                                | SEARO – 1 (100%)                                                                                 |
| Individual-level delay                                   | AFRO – 3 (23%); EURO – 1 (8%); EMRO – 2 (15%); SEARO – 3 (23%); WPRO – 4 (31%)                                      | AFRO – 1 (14%); AMRO – 1 (14%); EURO – 1 (14%); EMRO – 1 (14%); SEARO – 1 (14%); WPRO – 2 (29%) | AFRO – 14 (37%); AMRO – 1 (3%); EURO – 3 (8%); EMRO – 3 (8%); SEARO – 8 (21%); WPRO – 9 (24%);   |
| Provider/system-level delay                              | AFRO – 3 (27%); AMRO – 1 (9%); EURO – 1 (9%); EMRO – 1 (9%); SEARO – 1 (9%); WPRO – 4 (36%)                         | AFRO – 1 (50%); EMRO – 1 (50%)                                                                  | AFRO – 5 (21%); AMRO – 2 (8%); EURO – 3 (13%); SEARO – 7 (29%); WPRO – 7 (29%)                   |
| Combined individual, provider, and system-level delay    | AFRO – 1 (11%); AMRO – 1 (11%); EURO – 1 (11%); EMRO – 1 (11%); Multiple – 1 (11%); SEARO – 2 (22%); WPRO – 2 (22%) | EMRO – 1 (100%)                                                                                 | AFRO – 5 (29%); AMRO – 3 (18%); EURO – 2 (12%); EMRO – 3 (18%); SEARO – 1 (6%); WPRO – 3 (18%)   |

WHO region: AFRO, African region; AMRO, region of the Americas; EMRO, Eastern Mediterranean region; EURO, European region; SEARO, South East Asia region; WPRO, Western Pacific region.
