# Supplementary material for: Barriers and Delays in Tuberculosis Diagnosis and Treatment Services: Does Gender Matter?
Source: Hindawi journal article supplement (doi:10.1155/2014/461935), 2014-01-01
Supplement: f1 [file 461935.f1.zip]

TableS1. Summary of included studies

| First Author<br>Year<br>Country<br>Setting | Type of study<br>Sample size (N)<br>(% female)<br>Age(years) | Study<br>population   | Individual-level<br>delay | Provider-<br>/system-level<br>delay | Type of<br>provider-<br>/system-<br>delay | Combined<br>individual-<br>/provider-/<br>system-level<br>delay | Type of<br>combined<br>delay | Individual-level barriers |          |                                                                                                                                                                                                                                                |                                                                                                                                                                                                                                                         |                  | Provider-<br>/system-level<br>barriers | Combined<br>individual-<br>/provider-/<br>system-level<br>barrier |
|--------------------------------------------|--------------------------------------------------------------|-----------------------|---------------------------|-------------------------------------|-------------------------------------------|-----------------------------------------------------------------|------------------------------|---------------------------|----------|------------------------------------------------------------------------------------------------------------------------------------------------------------------------------------------------------------------------------------------------|---------------------------------------------------------------------------------------------------------------------------------------------------------------------------------------------------------------------------------------------------------|------------------|----------------------------------------|-------------------------------------------------------------------|
|                                            |                                                              |                       |                           |                                     |                                           |                                                                 |                              | Financial                 | Physical | Stigma                                                                                                                                                                                                                                         | Health literacy                                                                                                                                                                                                                                         | Sociodemographic |                                        |                                                                   |
| CROSS-SECTIONAL STUDY                      |                                                              |                       |                           |                                     |                                           |                                                                 |                              |                           |          |                                                                                                                                                                                                                                                |                                                                                                                                                                                                                                                         |                  |                                        |                                                                   |
| Cramm<br>2010<br>South Africa<br>Unknown   | Cross-sectional<br>1042<br>73.0%<br>Median=38                | General<br>population | -                         | -                                   | -                                         | -                                                               | -                            | -                         | -        | No significant<br>difference in attitude<br>toward people with<br>TB between men and<br>women, however,<br>more women reported<br>their fear that people<br>would talk about it as<br>a reason to delay<br>clinic visit (OR:<br>1.142, p<0.05) | No significance<br>difference in TB<br>knowledge score<br>between men and<br>women (p=0.083)                                                                                                                                                            | -                | -                                      | -                                                                 |
| Deribew<br>2010<br>Ethiopia<br>Mixed       | Cross-sectional<br>750<br>58.0%<br>Mean<br>(SD)=31.2(11.0)   | General<br>population | -                         | -                                   | -                                         | -                                                               | -                            | -                         | -        | A larger proportion of<br>females than males<br>had high prejudice<br>toward patients with<br>TB (aOR: 1.3, 95% CI<br>1.0, 1.9)                                                                                                                | Men were more likely<br>to recognize that<br>weight loss, shortness<br>of breath, chest pain,<br>and poor appetite are<br>TB symptoms (47.2%<br>vs 39.0% p=0.029,<br>20.5% vs 14.8%<br>p=0.05, 20.8% vs<br>13.1% p=0.006,<br>20.8% vs 13.3%<br>p=0.02). | -                | -                                      | -                                                                 |

TableS1. Summary of included studies

| First Author<br>Year<br>Country<br>Setting       | Type of study<br>Sample size (N)<br>(% female)<br>Age(years)         | Study<br>population                      | Individual-level<br>delay | Provider-<br>/system-level<br>delay | Type of<br>provider-<br>/system-<br>delay | Combined<br>individual-<br>/provider-/<br>system-level<br>delay | Type of<br>combined<br>delay | Individual-level barriers                                                                                           |          |                                                                                                                                                                                                                                                                                                                                                                                                                                                                                                                                                                                                                                                                                                                                                                                                                   |                                                                                                  |                  | Provider-<br>/system-level<br>barriers | Combined<br>individual-<br>/provider-/<br>system-level<br>barrier |
|--------------------------------------------------|----------------------------------------------------------------------|------------------------------------------|---------------------------|-------------------------------------|-------------------------------------------|-----------------------------------------------------------------|------------------------------|---------------------------------------------------------------------------------------------------------------------|----------|-------------------------------------------------------------------------------------------------------------------------------------------------------------------------------------------------------------------------------------------------------------------------------------------------------------------------------------------------------------------------------------------------------------------------------------------------------------------------------------------------------------------------------------------------------------------------------------------------------------------------------------------------------------------------------------------------------------------------------------------------------------------------------------------------------------------|--------------------------------------------------------------------------------------------------|------------------|----------------------------------------|-------------------------------------------------------------------|
|                                                  |                                                                      |                                          |                           |                                     |                                           |                                                                 |                              | Financial                                                                                                           | Physical | Stigma                                                                                                                                                                                                                                                                                                                                                                                                                                                                                                                                                                                                                                                                                                                                                                                                            | Health literacy                                                                                  | Sociodemographic |                                        |                                                                   |
| Dhingra<br>2010<br>India<br>Urban                | Cross-sectional<br>1977<br>42.1%<br>-                                | New PTB<br>patients;<br>EPTB<br>patients | -                         | -                                   | -                                         | -                                                               | -                            | -                                                                                                                   | -        | Family level:<br>No significant<br>difference by gender<br>in disclosure of<br>disease in their family<br>(M 98.9% vs F 99.6%<br>p>0.05) or worried<br>about marriage<br>prospect among<br>unmarried patients (M<br>73% vs W 63.5%,<br>p>0.05) Females were<br>less likely than males<br>to share TB<br>information with<br>family members<br>(52.2% vs 64.9%,<br>p<0.05) and were<br>more likely to<br>experience spouse's<br>change of attitude<br>toward them (11.4%<br>vs 5.5% p<0.05)<br>Work level:<br>Significantly less<br>females disclosed their<br>disease status to<br>colleagues and<br>employers (p<0.05)<br>Society level:<br>Intense stigma was<br>observed with 60% of<br>patients hiding their<br>disease, stigma at this<br>level was found to be<br>more in females than<br>in males (p<0.05) | -                                                                                                | -                | -                                      | -                                                                 |
| Mesfin <sup>1</sup><br>2010<br>Ethiopia<br>Mixed | Cross-sectional<br>924<br>45%<br>Median=34 years                     | New TB<br>cases                          | -                         | -                                   | -                                         | -                                                               | -                            | Total cost per person<br>diagnosed is higher in<br>women, because women<br>incurred higher escort-<br>related costs | -        | -                                                                                                                                                                                                                                                                                                                                                                                                                                                                                                                                                                                                                                                                                                                                                                                                                 | -                                                                                                | -                | -                                      | -                                                                 |
| Mushtaq<br>2010<br>Pakistan<br>Mixed             | Cross-sectional<br>1080<br>23.5%<br>61.6% between 31 and<br>50 years | General<br>population                    | -                         | -                                   | -                                         | -                                                               | -                            | -                                                                                                                   | -        | --                                                                                                                                                                                                                                                                                                                                                                                                                                                                                                                                                                                                                                                                                                                                                                                                                | No significant<br>difference in good TB<br>knowledge (male<br>41.2% vs female<br>47.2%), p=0.095 | -                | -                                      | -                                                                 |

**TableS1. Summary of included studies**

[illegible]

TableS1. Summary of included studies

| First Author<br>Year<br>Country<br>Setting | Type of study<br>Sample size (N)<br>(% female)<br>Age(years)                                   | Study<br>population | Individual-level<br>delay                                    | Provider-<br>/system-level<br>delay | Type of<br>provider-<br>/system-<br>delay | Combined<br>individual-<br>/provider-/<br>system-level<br>delay                                                                                  | Type of<br>combined<br>delay | Individual-level barriers |          |                                                                                                 |                                                                                                                                                                                                                                                                                                                                                   |                  | Provider-<br>/system-level<br>barriers | Combined<br>individual-<br>/provider-/<br>system-level<br>barrier |
|--------------------------------------------|------------------------------------------------------------------------------------------------|---------------------|--------------------------------------------------------------|-------------------------------------|-------------------------------------------|--------------------------------------------------------------------------------------------------------------------------------------------------|------------------------------|---------------------------|----------|-------------------------------------------------------------------------------------------------|---------------------------------------------------------------------------------------------------------------------------------------------------------------------------------------------------------------------------------------------------------------------------------------------------------------------------------------------------|------------------|----------------------------------------|-------------------------------------------------------------------|
|                                            |                                                                                                |                     |                                                              |                                     |                                           |                                                                                                                                                  |                              | Financial                 | Physical | Stigma                                                                                          | Health literacy                                                                                                                                                                                                                                                                                                                                   | Sociodemographic |                                        |                                                                   |
| French<br>2009<br>England<br>Mixed         | Cross-sectional<br>22856<br>45%<br>Median= 36 (IQR 26-54)                                      | TB cases            | -                                                            | -                                   | -                                         | Females had statistically significant longer delays from symptom onset to treatment initiation than males. 71 days vs 65 days (HR= 0.9, p<0.001) | ^                            | -                         | -        | -                                                                                               | -                                                                                                                                                                                                                                                                                                                                                 | -                | -                                      | -                                                                 |
| Gele<br>2009<br>Ethiopia<br>Rural          | Cross-sectional<br>226<br>45.3%<br>Mean= 32.2(SD 13.0)                                         | TB cases            | There was no significant gender differences in patient delay | -                                   | -                                         | -                                                                                                                                                | -                            | -                         | -        | -                                                                                               | -                                                                                                                                                                                                                                                                                                                                                 | -                | -                                      | -                                                                 |
| Hoa<br>2009<br>Vietnam<br>Rural            | Cross-sectional<br>12143<br>58.3%<br>31.6% between 15-34;<br>43.6 % between 35-54; 24.8% >= 55 | General population  | -                                                            | -                                   | -                                         | -                                                                                                                                                | -                            | -                         | -        | Significantly more women associated heavy stigma with a TB diagnosis (48.7% vs 35.1%, p<0.0001) | Significantly higher knowledge score in men; more men knew TB mode of transmission, sputum smear exam, and free TB drugs (77.9%, 65.7% p<0.001, 66% vs 54.5% p<0.001, 57% vs 45.3% p<0.001 ); fewer men knew hemoptysis as a symptom of TB (15.4% vs 17.3%, p<0.05); higher mean knowledge score was associated with visiting a hospital (p<0.01) | -                | -                                      | -                                                                 |

**TableS1. Summary of included studies**

[illegible]

TableS1. Summary of included studies

| First Author<br>Year<br>Country<br>Setting      | Type of study<br>Sample size (N)<br>(% female)<br>Age(years) | Study<br>population   | Individual-level<br>delay | Provider-<br>/system-level<br>delay | Type of<br>provider-<br>/system-<br>delay | Combined<br>individual-<br>/provider-/<br>system-level<br>delay | Type of<br>combined<br>delay | Individual-level barriers                                                                                                                                                                                                    |          |                                                                                                                                  |                                                                                                                                                                                                                                                    |                  | Provider-<br>/system-level<br>barriers                                                           | Combined<br>individual-<br>/provider-/<br>system-level<br>barrier                                                                                                               |
|-------------------------------------------------|--------------------------------------------------------------|-----------------------|---------------------------|-------------------------------------|-------------------------------------------|-----------------------------------------------------------------|------------------------------|------------------------------------------------------------------------------------------------------------------------------------------------------------------------------------------------------------------------------|----------|----------------------------------------------------------------------------------------------------------------------------------|----------------------------------------------------------------------------------------------------------------------------------------------------------------------------------------------------------------------------------------------------|------------------|--------------------------------------------------------------------------------------------------|---------------------------------------------------------------------------------------------------------------------------------------------------------------------------------|
|                                                 |                                                              |                       |                           |                                     |                                           |                                                                 |                              | Financial                                                                                                                                                                                                                    | Physical | Stigma                                                                                                                           | Health literacy                                                                                                                                                                                                                                    | Sociodemographic |                                                                                                  |                                                                                                                                                                                 |
| Yimer <sup>3</sup><br>2009<br>Ethiopia<br>Rural | Cross-sectional<br>1006<br>53.9%<br>Mean=40 years            | TB suspects           | -                         | -                                   | -                                         | -                                                               | -                            | -                                                                                                                                                                                                                            | -        | -                                                                                                                                | -                                                                                                                                                                                                                                                  | -                | -                                                                                                | A higher proportion of TB patients detected by active case-finding were female (63.2%, p=0.04). Women had a 3.43 higher odds than men of being detected by ACF vs PCF (p=0.05). |
| Al-Maniri<br>2008<br>Oman<br>Urban              | Cross-sectional<br>257<br>53.9%<br>Mean age 41.3             | General Practitioners | -                         | -                                   | -                                         | -                                                               | -                            | -                                                                                                                                                                                                                            | -        | -                                                                                                                                | -                                                                                                                                                                                                                                                  | -                | No correlation between gender and TB Knowledge score (regression score -0.08, CI95% -0.94, 0.77) | -                                                                                                                                                                               |
| Armijos<br>2008<br>Ecuador<br>Urban             | Cross-sectional<br>212<br>62.7%<br>Range= 18-80              | TB suspects           | -                         | -                                   | -                                         | -                                                               | -                            | -                                                                                                                                                                                                                            | -        | More women than men indicated that they would keep an employeewith TB and help them to get treatment (28.9% vs. 5.4%,P = 0.003). | Gender did not predict reported TB familiarity. More men than women (35.4% vs. 14.3%, P = 0.001) identified an infectious cause for TB. Men were lesslikely than women to indicate that TBcan be transmitted by fomites (41.7% vs 23.4%, p= 0.02). | -                | -                                                                                                | -                                                                                                                                                                               |
| Aspler<br>2008<br>Zambia<br>Urban               | Cross-sectional<br>103<br>43.0%<br>Mean=32; range 18-53      | PTB andEPTB cases     | -                         | -                                   | -                                         | -                                                               | -                            | Total costs as a proportion of median monthly income were significantly higher for women than men (132% vs 10.1%). Pre-diagnosis costs as a proportion of median monthly income were higher for women than men (113% vs 7%). | -        | -                                                                                                                                | -                                                                                                                                                                                                                                                  | -                | -                                                                                                | -                                                                                                                                                                               |

TableS1. Summary of included studies

| First Author<br>Year<br>Country<br>Setting                                           | Type of study<br>Sample size (N)<br>(% female)<br>Age(years)    | Study<br>population     | Individual-level<br>delay                                                           | Provider-<br>/system-level<br>delay | Type of<br>provider-<br>/system-<br>delay | Combined<br>individual-<br>/provider-/<br>system-level<br>delay                                                                                                                                                                                                                                                                      | Type of<br>combined<br>delay | Individual-level barriers |          |        |                                                                                                                                                   |                                                                                                                                                                                                              | Provider-<br>/system-level<br>barriers | Combined<br>individual-<br>/provider-<br>/system-level<br>barrier |
|--------------------------------------------------------------------------------------|-----------------------------------------------------------------|-------------------------|-------------------------------------------------------------------------------------|-------------------------------------|-------------------------------------------|--------------------------------------------------------------------------------------------------------------------------------------------------------------------------------------------------------------------------------------------------------------------------------------------------------------------------------------|------------------------------|---------------------------|----------|--------|---------------------------------------------------------------------------------------------------------------------------------------------------|--------------------------------------------------------------------------------------------------------------------------------------------------------------------------------------------------------------|----------------------------------------|-------------------------------------------------------------------|
|                                                                                      |                                                                 |                         |                                                                                     |                                     |                                           |                                                                                                                                                                                                                                                                                                                                      |                              | Financial                 | Physical | Stigma | Health literacy                                                                                                                                   | Sociodemographic                                                                                                                                                                                             |                                        |                                                                   |
| Ayuo<br>2008<br>Kenya<br>mixed                                                       | Cross-sectional<br>230<br>35.7%<br>Median= 28.5; range<br>12-80 | TB cases                | No significant<br>difference in<br>mean patient<br>delay was<br>found by<br>gender. | -                                   | -                                         | -                                                                                                                                                                                                                                                                                                                                    |                              | -                         | -        | -      | No significant<br>difference in level of<br>education by gender<br>(p=0.08)                                                                       | Women were as likely as<br>men to be<br>widowed/separated/divorced<br>(19.51% vs 12.16%,<br>p=0.19); Being<br>widowed/separated/divorced<br>was a predictor of longer<br>patient-level delay (p =<br>0.015). | -                                      | -                                                                 |
| Bassili<br>2008<br>Egypt, Iran, Iraq,<br>Pakistan, Somalia,<br>Syria, Yemen<br>Mixed | Cross-sectional<br>5053<br>39.7%<br>Majority 15-35              | TB cases                | -                                                                                   | -                                   | -                                         | Yemenese<br>women had<br>significantly<br>longer total<br>delay<br>(adjusted OR<br>2.29, 95% CI<br>1.26-4.14)<br>and Egyptian<br>women had<br>significantly<br>shorter total<br>delay<br>(adjusted OR<br>0.62, 95% CI<br>0.39-0.99),<br>whereas<br>there were<br>no difference<br>by gender in<br>delay among<br>other<br>countries. | ^                            | -                         | -        | -      | -                                                                                                                                                 | -                                                                                                                                                                                                            | -                                      | -                                                                 |
| Brassard<br>2008<br>Canada<br>Urban                                                  | Cross-sectional<br>164<br>48.8%<br>Mean= 38 (SD 10.8)           | High-risk<br>population | -                                                                                   | -                                   | -                                         | -                                                                                                                                                                                                                                                                                                                                    | -                            | -                         | -        | -      | Females had higher<br>odds of reporting no<br>TB knowledge than<br>males. This was not<br>statistically<br>significant. (OR= 1.6,<br>CI= 0.8-3.1) | -                                                                                                                                                                                                            | -                                      | -                                                                 |
| Chimbanrai<br>2008<br>Thailand<br>Mixed                                              | Cross-sectional<br>300<br>42.7%<br>Mean= 39.9 (SD 14.9)         | PTB cases               | -                                                                                   | -                                   | -                                         | -                                                                                                                                                                                                                                                                                                                                    | -                            | -                         | -        | -      | Males were found to<br>have poorer TB<br>knowledge than<br>females.(P=0.001)                                                                      | -                                                                                                                                                                                                            | -                                      | -                                                                 |

### TableS1. Summary of included studies

[illegible]



### TableS1. Summary of included studies

[illegible]

TableS1. Summary of included studies

| First Author<br>Year<br>Country<br>Setting | Type of study<br>Sample size (N)<br>(% female)<br>Age(years)                                             | Study<br>population | Individual-level<br>delay                                                                            | Provider-<br>/system-level<br>delay                                                                                                                                                                                                                                                                            | Type of<br>provider-<br>/system-<br>delay | Combined<br>individual-<br>/provider-/<br>system-level<br>delay | Type of<br>combined<br>delay | Individual-level barriers                                                              |                                                                                                                                                                                                                                        |                                                                                                           |                                                                                                             |                  | Provider-<br>/system-level<br>barriers | Combined<br>individual-<br>/provider-/<br>system-level<br>barrier |
|--------------------------------------------|----------------------------------------------------------------------------------------------------------|---------------------|------------------------------------------------------------------------------------------------------|----------------------------------------------------------------------------------------------------------------------------------------------------------------------------------------------------------------------------------------------------------------------------------------------------------------|-------------------------------------------|-----------------------------------------------------------------|------------------------------|----------------------------------------------------------------------------------------|----------------------------------------------------------------------------------------------------------------------------------------------------------------------------------------------------------------------------------------|-----------------------------------------------------------------------------------------------------------|-------------------------------------------------------------------------------------------------------------|------------------|----------------------------------------|-------------------------------------------------------------------|
|                                            |                                                                                                          |                     |                                                                                                      |                                                                                                                                                                                                                                                                                                                |                                           |                                                                 |                              | Financial                                                                              | Physical                                                                                                                                                                                                                               | Stigma                                                                                                    | Health literacy                                                                                             | Sociodemographic |                                        |                                                                   |
| Mfinanga<br>2008<br>Tanzania<br>Urban      | Cross-sectional<br>639<br>39.3%<br>Mean<br>(SD)=35.1(12.1) years<br>for males; 33.1(11.2)<br>for females | SSM+ TB<br>cases    | Women had<br>longer patient<br>delay>30 days<br>(41.0% vs<br>31.5%,<br>p=0.019)                      | More women<br>had referral<br>delay >2 days<br>(94.6% vs<br>86.2%,<br>p=0.019);<br>more women<br>had diagnostic<br>delay>3 days<br>(62.1% vs<br>47.0%,<br>p=0.001);<br>more women<br>had facility<br>delay>5 days<br>(88.8% vs<br>79.8%,<br>p=0.005); no<br>significant<br>difference in<br>treatment<br>delay | *, #, @                                   | -                                                               | -                            | Having no employment<br>was associated diagnostic<br>delay among women, but<br>not men | Although<br>distance from<br>residence to<br>facility with<br>DOTS was<br>similar for both<br>men and<br>women,<br>distance>5Km<br>was associated<br>with more<br>diagnostic<br>delay among<br>women, than<br>men.                     | -                                                                                                         | Poor knowledge of<br>TB symptoms were<br>associated with<br>diagnostic delay<br>among women, but<br>not men | -                | -                                      | -                                                                 |
| Continuation of<br>Mfinanga<br>2008        |                                                                                                          |                     |                                                                                                      |                                                                                                                                                                                                                                                                                                                |                                           | -                                                               | -                            |                                                                                        | Among<br>patients living<br>within 5km<br>from the health<br>facility the<br>proportion of<br>males vs<br>females was<br>65.8 vs 61.6%;<br>for distance 5-<br>10km it was<br>85% vs 63%;<br>for distance<br>>10km it was<br>47% vs 33% | -                                                                                                         |                                                                                                             | -                | -                                      | -                                                                 |
| Qureshi<br>2008<br>Pakistan<br>Urban       | Cross-sectional<br>301<br>46.8%<br>Median among<br>females: 32<br>Median among males:<br>35              | TB cases            | Women had<br>longer patient<br>delay (median<br>35 days in<br>women, 29<br>days in men,<br>p<0.001). | -                                                                                                                                                                                                                                                                                                              | -                                         | -                                                               | -                            | -                                                                                      | -                                                                                                                                                                                                                                      | 27% reported the<br>presence of stigma<br>related to TB. Both<br>men and women were<br>affected by stigma | No significant<br>difference in<br>knowledge about of<br>TB.                                                | -                | -                                      | -                                                                 |



TableS1. Summary of included studies

| First Author<br>Year<br>Country<br>Setting                                                                                                 | Type of study<br>Sample size (N)<br>(% female)<br>Age(years) | Study<br>population | Individual-level<br>delay | Provider-<br>/system-level<br>delay | Type of<br>provider-<br>/system-<br>delay | Combined<br>individual-<br>/provider-/<br>system-level<br>delay | Type of<br>combined<br>delay | Individual-level barriers |          |                                                                                                                                                                                                                                                                                                                                                                                                                                                                                                                                                                                                                                                                                                                                                                                                                                                                                                                                                                                                                                                                   |                 |                  | Provider-<br>/system-level<br>barriers | Combined<br>individual-<br>/provider-/<br>system-level<br>barrier |
|--------------------------------------------------------------------------------------------------------------------------------------------|--------------------------------------------------------------|---------------------|---------------------------|-------------------------------------|-------------------------------------------|-----------------------------------------------------------------|------------------------------|---------------------------|----------|-------------------------------------------------------------------------------------------------------------------------------------------------------------------------------------------------------------------------------------------------------------------------------------------------------------------------------------------------------------------------------------------------------------------------------------------------------------------------------------------------------------------------------------------------------------------------------------------------------------------------------------------------------------------------------------------------------------------------------------------------------------------------------------------------------------------------------------------------------------------------------------------------------------------------------------------------------------------------------------------------------------------------------------------------------------------|-----------------|------------------|----------------------------------------|-------------------------------------------------------------------|
|                                                                                                                                            |                                                              |                     |                           |                                     |                                           |                                                                 |                              | Financial                 | Physical | Stigma                                                                                                                                                                                                                                                                                                                                                                                                                                                                                                                                                                                                                                                                                                                                                                                                                                                                                                                                                                                                                                                            | Health literacy | Sociodemographic |                                        |                                                                   |
| Somma <sup>4</sup><br>2008<br>Bangladesh, India,<br>Malawi and<br>Colombia<br>Rural (Bangladesh)<br>Urban (Colombia,<br>India, and Malawi) | Cross-sectional<br>427<br>~50%<br>: -                        | TB cases            | -                         | -                                   | -                                         | -                                                               | -                            | -                         | -        | Females in Bangladesh have a significantly higher stigma index (p=0.04); in India, the male-female difference was suggestive but not significant (p=0.01). In Bangladesh and to a lesser degree in India, impaired self-esteem, shame/embarrassment and perceived low regard of others were likely to be reported by women. Concern about social isolation was also more frequently reported by women in Bangladesh. For women with low self-esteem and concern about social isolation in the South Asian sites, these feelings were often related to the experience of having been actively isolated because of their disease, or forced to move away from their homes. Work-related aspects of stigma were frequently reported, and they were more likely to be an issue for men, except in Colombia where more women said they had decided to stay away from work and groups. In the multivariate analysis, never having been married was associated with greater stigma in India and Malawi but increasing age in Bangladesh was associated with less stigma. | -               | -                | -                                      | -                                                                 |

**TableS1. Summary of included studies**

[illegible]

TableS1. Summary of included studies

| First Author<br>Year<br>Country<br>Setting                                                                   | Type of study<br>Sample size (N)<br>(% female)<br>Age(years)  | Study<br>population | Individual-level<br>delay                                                              | Provider-<br>/system-level<br>delay                                                                                                                                                                                                                                  | Type of<br>provider-<br>/system-<br>delay | Combined<br>individual-<br>/provider-/<br>system-level<br>delay                       | Type of<br>combined<br>delay | Individual-level barriers                                                                                                                                                                     |          |                                                                       |                                                                                                                                                                                                                                                                                                                      |                  | Provider-<br>/system-level<br>barriers | Combined<br>individual-<br>/provider-/<br>system-level<br>barrier |
|--------------------------------------------------------------------------------------------------------------|---------------------------------------------------------------|---------------------|----------------------------------------------------------------------------------------|----------------------------------------------------------------------------------------------------------------------------------------------------------------------------------------------------------------------------------------------------------------------|-------------------------------------------|---------------------------------------------------------------------------------------|------------------------------|-----------------------------------------------------------------------------------------------------------------------------------------------------------------------------------------------|----------|-----------------------------------------------------------------------|----------------------------------------------------------------------------------------------------------------------------------------------------------------------------------------------------------------------------------------------------------------------------------------------------------------------|------------------|----------------------------------------|-------------------------------------------------------------------|
|                                                                                                              |                                                               |                     |                                                                                        |                                                                                                                                                                                                                                                                      |                                           |                                                                                       |                              | Financial                                                                                                                                                                                     | Physical | Stigma                                                                | Health literacy                                                                                                                                                                                                                                                                                                      | Sociodemographic |                                        |                                                                   |
| Weiss <sup>4</sup><br>2008<br>Bangladesh, India,<br>Malawi<br>Rural(Bangladesh);<br>Urban (India,<br>Malawi) | Cross-sectional<br>329<br>49.0%<br>-                          | TB cases            | -                                                                                      | -                                                                                                                                                                                                                                                                    | -                                         | -                                                                                     | -                            | Men felt significantly more financial distress because of TB than women in all three countries (Bangladesh 63.5% vs14% , p<0.01; India: 75.8% vs 37.7% , p<0.01; Malawi: 78% vs 60% , p<0.05) | -        | No quantitative difference in social barriers in all three countries. | Significant differences in knowledge about perceived causes were reported at different levels in all three countries (some cause-specific non-significant differences were also reported); more women knew TB is transmitted through environmental exposure either through infection, contact, or airborne exposure. | -                | -                                      | -                                                                 |
| Chang<br>2007<br>Malaysia<br>Mixed                                                                           | Cross-sectional<br>316<br>38.9%<br>Median=45; range:<br>15-70 | TB cases            | Women were significantly more likely to delay health seeking (57% vs 36%, p=0.006).    | No significant difference in diagnostic delay between men and women (51% women vs 48% men, p=0.626)                                                                                                                                                                  | -                                         | -                                                                                     | -                            | -                                                                                                                                                                                             | -        | -                                                                     | -                                                                                                                                                                                                                                                                                                                    | -                | -                                      | -                                                                 |
| Huong<br>2007<br>Vietnam<br>Mixed                                                                            | Cross-sectional<br>2093<br>29.0%<br>56% between 25-54         | TB cases            | Women were significantly associated with longer patient delay (aOR 1.3, 95%CI 1.0-1.7) | No significant difference in health system delay (female vs male aOR 1.2, 95% CI 0.8-1.7); risk of long patient delay if the first provider was private rather than public was reduced by half among men, but to one third among women (test of interaction, p<0.05) | #                                         | Women were significantly associated with longer total delay (aOR 1.6, 95% CI 1.3-2.2) | ^                            | -                                                                                                                                                                                             | -        | -                                                                     | -                                                                                                                                                                                                                                                                                                                    | -                | -                                      | -                                                                 |

TableS1. Summary of included studies

| First Author<br>Year<br>Country<br>Setting | Type of study<br>Sample size (N)<br>(% female)<br>Age(years)       | Study<br>population        | Individual-level<br>delay                                | Provider-<br>/system-level<br>delay                                           | Type of<br>provider-<br>/system-<br>delay | Combined<br>individual-<br>/provider-/<br>system-level<br>delay                 | Type of<br>combined<br>delay | Individual-level barriers                                                                                                                                                                                                          |          |                                                                                                                                                                                                                                                                                                                                                                                                                                          |                                                                                |                                                                                                                                                                                       | Provider-<br>/system-level<br>barriers                                                       | Combined<br>individual-<br>/provider-/<br>system-level<br>barrier |
|--------------------------------------------|--------------------------------------------------------------------|----------------------------|----------------------------------------------------------|-------------------------------------------------------------------------------|-------------------------------------------|---------------------------------------------------------------------------------|------------------------------|------------------------------------------------------------------------------------------------------------------------------------------------------------------------------------------------------------------------------------|----------|------------------------------------------------------------------------------------------------------------------------------------------------------------------------------------------------------------------------------------------------------------------------------------------------------------------------------------------------------------------------------------------------------------------------------------------|--------------------------------------------------------------------------------|---------------------------------------------------------------------------------------------------------------------------------------------------------------------------------------|----------------------------------------------------------------------------------------------|-------------------------------------------------------------------|
|                                            |                                                                    |                            |                                                          |                                                                               |                                           |                                                                                 |                              | Financial                                                                                                                                                                                                                          | Physical | Stigma                                                                                                                                                                                                                                                                                                                                                                                                                                   | Health literacy                                                                | Sociodemographic                                                                                                                                                                      |                                                                                              |                                                                   |
| Karim<br>2007<br>Bangladesh<br>Mixed       | Cross Sectional<br>1000<br>50.0%<br>Mean= 37.7                     | TB cases                   | Women had significantly longer patient's delay than men. | No significant difference in doctor's, treatment , and health system's delays | *, #, @                                   | Women had significantly longer total delay and total diagnostic delay than men. | ^, \$                        | -                                                                                                                                                                                                                                  | -        | -                                                                                                                                                                                                                                                                                                                                                                                                                                        | -                                                                              | Older women had longer patient and treatment delays (test for interaction between age and sex: p=0.031, and 0.029 respectively).                                                      | -                                                                                            | -                                                                 |
| Karim<br>2007<br>Bangladesh<br>Unknown     | Cross-sectional<br>102<br>49.0%<br>Mean: M 40.6years; F 32.6 years | TB patients                | -                                                        | -                                                                             | -                                         | -                                                                               | -                            | -                                                                                                                                                                                                                                  | -        | The overall stigma index for female TB patients was significantly higher than it was for males. (p<0.05)<br>Females were significantly associated with greater prominence of the stigma indicators “shamed or embarrassed” “others refuse to visit” and willingness to disclose their illness to others”<br>Males were significantly associated with more partner refusal of sex due to TB, and decision to stay away from work, groups. | Women reported more schooling than men (mean = 6.6 years vs 4.3 years; p=0.00) | -                                                                                                                                                                                     | -                                                                                            | -                                                                 |
| Kaulagekar<br>2007<br>India<br>Mixed       | Cross-sectional<br>3001<br>40.0%<br>-                              | TB cases (prevalent cases) | -                                                        | -                                                                             | -                                         | -                                                                               | -                            | -                                                                                                                                                                                                                                  | -        | -                                                                                                                                                                                                                                                                                                                                                                                                                                        | -                                                                              | Women had significantly less treatment seeking than men in scheduled caste or tribe (p<0.001)<br>For women, higher age and being married was associated with decreased health-seeking | -                                                                                            | -                                                                 |
| Kemp<br>2007<br>Malawi<br>Urban            | Cross-sectional<br>179<br>49.0%<br>-                               | New PTB cases              | -                                                        | -                                                                             | -                                         | -                                                                               | -                            | Patient cost: no significant difference in direct cost (13 USD for men vs 12 USD for women); men had higher opportunity cost.<br>Household cost: women lost more income-earning opportunity because of caretaking responsibilities | -        | -                                                                                                                                                                                                                                                                                                                                                                                                                                        | -                                                                              | -                                                                                                                                                                                     | No significant difference in number of care-seeking episodes ( 5.4 for women vs 5.0 for men) | -                                                                 |





TableS1. Summary of included studies

| First Author<br>Year<br>Country<br>Setting | Type of study<br>Sample size (N)<br>(% female)<br>Age(years) | Study<br>population   | Individual-level<br>delay | Provider-<br>/system-level<br>delay | Type of<br>provider-<br>/system-<br>delay | Combined<br>individual-<br>/provider-/<br>system-level<br>delay | Type of<br>combined<br>delay | Individual-level barriers |          |        |                                                                                                                                                                                                                                                                                                                                                                                                                                                                                                                                                                                                                                                                                                                                                                                                                                                                                                                                                         |                  | Provider-<br>/system-level<br>barriers | Combined<br>individual-<br>/provider-/<br>system-level<br>barrier |
|--------------------------------------------|--------------------------------------------------------------|-----------------------|---------------------------|-------------------------------------|-------------------------------------------|-----------------------------------------------------------------|------------------------------|---------------------------|----------|--------|---------------------------------------------------------------------------------------------------------------------------------------------------------------------------------------------------------------------------------------------------------------------------------------------------------------------------------------------------------------------------------------------------------------------------------------------------------------------------------------------------------------------------------------------------------------------------------------------------------------------------------------------------------------------------------------------------------------------------------------------------------------------------------------------------------------------------------------------------------------------------------------------------------------------------------------------------------|------------------|----------------------------------------|-------------------------------------------------------------------|
|                                            |                                                              |                       |                           |                                     |                                           |                                                                 |                              | Financial                 | Physical | Stigma | Health literacy                                                                                                                                                                                                                                                                                                                                                                                                                                                                                                                                                                                                                                                                                                                                                                                                                                                                                                                                         | Sociodemographic |                                        |                                                                   |
| Sherma<br>2007<br>India<br>Mixed           | Cross-sectional<br>1008<br>40.6%<br>Mean<br>(SD)=35.3(12.0)  | General<br>population | -                         | -                                   | -                                         | -                                                               | -                            | -                         | -        | -      | A similar proportion of males and females thought that TB was an infectious disease (89.0% vs 89.5%, p=0.8). Among those who thought TB was an infectious disease, significantly fewer women than men thought TB could be transmitted through the air by coughing/sneezing (65.3% vs 76.4%, p=0.003); less women knew hospitalization as a measure to prevent TB transmission (21% vs 27.7%, p=0.01); more men knew cough >3 wks is a symptom of TB (p=0.01); more men knew sputum exam as a diagnostic for TB (47.3% vs 40.6% p=0.04); no significant difference in the knowledge of places where treatment was available (M 64.3% vs F 67.0%, p=0.37); no significant difference in the knowledge of treatment duration (p=0.17)<br>As many women as men thought that TB treatment, cough hygiene and use of separate utensils/food consumption would prevent TB transmission (89.5% vs 89.5%, p=0.998; 26.4% vs 26.7%, p=0.9; 10.5% vs 8.2%, p=0.2). | -                | -                                      | -                                                                 |

TableS1. Summary of included studies

| First Author<br>Year<br>Country<br>Setting         | Type of study<br>Sample size (N)<br>(% female)<br>Age(years)                               | Study<br>population                           | Individual-level<br>delay                                                                                                           | Provider-<br>/system-level<br>delay                                                                                        | Type of<br>provider-<br>/system-<br>delay | Combined<br>individual-<br>/provider-/<br>system-level<br>delay | Type of<br>combined<br>delay | Individual-level barriers |                                                                                                                                                                                                                                                                                                                                            |        |                                                                                 |                  | Provider-<br>/system-level<br>barriers                                                                                                                                                                                                                                                          | Combined<br>individual-<br>/provider-/<br>system-level<br>barrier |
|----------------------------------------------------|--------------------------------------------------------------------------------------------|-----------------------------------------------|-------------------------------------------------------------------------------------------------------------------------------------|----------------------------------------------------------------------------------------------------------------------------|-------------------------------------------|-----------------------------------------------------------------|------------------------------|---------------------------|--------------------------------------------------------------------------------------------------------------------------------------------------------------------------------------------------------------------------------------------------------------------------------------------------------------------------------------------|--------|---------------------------------------------------------------------------------|------------------|-------------------------------------------------------------------------------------------------------------------------------------------------------------------------------------------------------------------------------------------------------------------------------------------------|-------------------------------------------------------------------|
|                                                    |                                                                                            |                                               |                                                                                                                                     |                                                                                                                            |                                           |                                                                 |                              | Financial                 | Physical                                                                                                                                                                                                                                                                                                                                   | Stigma | Health literacy                                                                 | Sociodemographic |                                                                                                                                                                                                                                                                                                 |                                                                   |
| Tiwari<br>2007<br>Nepal<br>Armed conflict<br>areas | Cross-sectional<br>180<br>30.6%<br>Median: 12-45 years                                     | TB cases                                      | -                                                                                                                                   | -                                                                                                                          | -                                         | -                                                               | -                            | -                         | No significant<br>difference in<br>visiting TB<br>services was<br>found by effect<br>of armed<br>conflict (e.g.<br>curfew,<br>casualties,<br>killings)<br>between male<br>and female was<br>found due to<br>location of<br>DOTS center<br>(p=0.05).<br>More women<br>could not go<br>health center<br>during rainy<br>season<br>(p=0.019). | -      | Males had<br>significantly higher<br>rate of literacy than<br>females (P=0.001) | -                | No significant<br>difference in<br>waiting time<br>(p=0.699),<br>separate exam<br>room<br>(p=0.637), and<br>frequency of<br>staff advice<br>(p=0.268). No<br>significant<br>difference in<br>satisfaction<br>with TB<br>services<br>between men<br>(89.6%) and<br>women<br>(87.0%,<br>p=0.647). | -                                                                 |
| Wondimu<br>2007<br>Ethiopia<br>Mixed               | Cross-sectional<br>198<br>56.3%<br>Mean(SD)=33.6(14.1)<br>for men; 29.7(11.8)<br>for women | TB cases                                      | Patient delay<br>was<br>significantly<br>longer in<br>females (aHR<br>0.63, 95% CI<br>0.47-0.84,<br>p=0.002)                        | Female<br>patients had<br>significantly<br>shorter health<br>system delays<br>(aHR 1.51,<br>95% CI 1.12-<br>2.04, p=0.007) | #                                         | -                                                               | -                            | -                         | -                                                                                                                                                                                                                                                                                                                                          | -      | -                                                                               | -                | -                                                                                                                                                                                                                                                                                               | -                                                                 |
| Xu<br>2007<br>China<br>Rural                       | Cross-sectional<br>1204<br>38.4%<br>Median=40-59 years                                     | Hospitalized<br>TB suspects                   | No significant<br>difference<br>between males<br>and females in<br>patient delay<br>(M/F aRR 1.09<br>95% CI 0.96-<br>1.23, p=0.19). | -                                                                                                                          | -                                         | -                                                               | -                            | -                         | -                                                                                                                                                                                                                                                                                                                                          | -      | -                                                                               | -                | -                                                                                                                                                                                                                                                                                               | -                                                                 |
| Yan<br>2007<br>China<br>Rural                      | Cross-sectional<br>889<br>-<br>-                                                           | Community<br>residents<br>and PTB<br>patients | -                                                                                                                                   | In 1 of 4<br>provinces,<br>system delay<br>higher for<br>women than<br>men (35% vs<br>25%, p=0.04)                         | *                                         | -                                                               | -                            | -                         | -                                                                                                                                                                                                                                                                                                                                          | -      | -                                                                               | -                | -                                                                                                                                                                                                                                                                                               | -                                                                 |
| Zhang<br>2007<br>China<br>Rural                    | Cross-sectional<br>614<br>48.9%<br>-                                                       | General<br>population                         | -                                                                                                                                   | -                                                                                                                          | -                                         | -                                                               | -                            | -                         | -                                                                                                                                                                                                                                                                                                                                          | -      | More men knew how<br>TB was spread (44%<br>vs 36% , p<0.05 )                    | -                | -                                                                                                                                                                                                                                                                                               | -                                                                 |

TableS1. Summary of included studies

| First Author<br>Year<br>Country<br>Setting | Type of study<br>Sample size (N)<br>(% female)<br>Age(years)                                                                                                                                          | Study<br>population            | Individual-level<br>delay                                                                                                                                                     | Provider-<br>/system-level<br>delay                                                             | Type of<br>provider-<br>/system-<br>delay | Combined<br>individual-<br>/provider-/<br>system-level<br>delay                             | Type of<br>combined<br>delay | Individual-level barriers |          |        |                 |                  | Provider-<br>/system-level<br>barriers                                                                                     | Combined<br>individual-<br>/provider-<br>/system-level<br>barrier |
|--------------------------------------------|-------------------------------------------------------------------------------------------------------------------------------------------------------------------------------------------------------|--------------------------------|-------------------------------------------------------------------------------------------------------------------------------------------------------------------------------|-------------------------------------------------------------------------------------------------|-------------------------------------------|---------------------------------------------------------------------------------------------|------------------------------|---------------------------|----------|--------|-----------------|------------------|----------------------------------------------------------------------------------------------------------------------------|-------------------------------------------------------------------|
|                                            |                                                                                                                                                                                                       |                                |                                                                                                                                                                               |                                                                                                 |                                           |                                                                                             |                              | Financial                 | Physical | Stigma | Health literacy | Sociodemographic |                                                                                                                            |                                                                   |
| Farah<br>2006<br>Norway<br>Unknown         | Cross-sectional<br>83<br>47.0%<br>Median=32                                                                                                                                                           | TB cases,<br>including<br>EPTB | Sex was not<br>associated with<br>patient delay                                                                                                                               | Gender was<br>not associated<br>with health<br>system delay                                     | #                                         | Gender was<br>not<br>associated<br>with total<br>delay in TB<br>treatment                   | ^                            | -                         | -        | -      | -               | -                | -                                                                                                                          | -                                                                 |
| Fochsen<br>2006<br>India<br>Rural          | Cross-sectional<br>644 interviewed for<br>health seeking<br>behavior; 445 with<br>cough and sought care<br>25.8% (of 644) and<br>26.5% (of 445)<br>53.3% of population<br>with cough between<br>15-54 | TB suspects                    | -                                                                                                                                                                             | -                                                                                               | -                                         | -                                                                                           | -                            | -                         | -        | -      | -               | -                | No significant<br>difference by<br>gender in<br>being<br>provided<br>sputum<br>examination<br>(aOR 1.2, 95%<br>CI 0.5-2.9) | -                                                                 |
| Pehme<br>2006<br>Estonia<br>Mixed          | Cross-sectional<br>185<br>31.9%<br>-                                                                                                                                                                  | New PTB<br>cases               | Males were<br>more likely to<br>have prolonged<br>and extreme<br>patient delay<br>(M/F aOR 2.12<br>95% CI 1.06-<br>4.23, p<0.05,<br>and 3.28 95%<br>CI 1.30-8.26,<br>p<0.05). | -                                                                                               | -                                         | -                                                                                           | -                            | -                         | -        | -      | -               | -                | -                                                                                                                          | -                                                                 |
| Rojpibulstit<br>2006<br>Thailand<br>Mixed  | Cross-sectional<br>202<br>22.8%<br>Mean(SD)=43.3(16.2)                                                                                                                                                | SSM+PTB<br>cases               | No significant<br>difference in<br>patient delay<br>(F/M aHR 1.00<br>95% CI 0.68-<br>1.46)                                                                                    | No significant<br>difference in<br>health system<br>delay (F/M<br>aHR 0.86 95%<br>CI 0.59-1.24) | *                                         | -                                                                                           | -                            | -                         | -        | -      | -               | -                | -                                                                                                                          | -                                                                 |
| Saly<br>2006<br>Cambodia<br>Rural          | Cross-sectional<br>308<br>49.7%<br>Mean(SD)=46(15.1)                                                                                                                                                  | SSM+ TB<br>cases               | -                                                                                                                                                                             | -                                                                                               | -                                         | No<br>significant<br>difference in<br>total delay                                           | ^                            | -                         | -        | -      | -               | -                | -                                                                                                                          |                                                                   |
| Sarmiento<br>2006<br>USA<br>Urban          | Cross-sectional<br>39<br>30.8%<br>Mean(SD)=41.6(14.4)                                                                                                                                                 | New TB<br>cases                | -                                                                                                                                                                             | -                                                                                               | -                                         | No<br>significant<br>difference in<br>total delay<br>(M 21.3 wks<br>F 13.4 wks,<br>p=0.497) | \$                           | -                         | -        | -      | -               | -                | -                                                                                                                          |                                                                   |

### TableS1. Summary of included studies

[illegible]

TableS1. Summary of included studies

| First Author<br>Year<br>Country<br>Setting | Type of study<br>Sample size (N)<br>(% female)<br>Age(years)                          | Study<br>population | Individual-level<br>delay | Provider-<br>/system-level<br>delay                                                                                                                                                                              | Type of<br>provider-<br>/system-<br>delay | Combined<br>individual-<br>/provider-/<br>system-level<br>delay                                                                                        | Type of<br>combined<br>delay | Individual-level barriers |          |        |                                                                                                                                                                                                                                                                                                                                                                                                               |                  | Provider-<br>/system-level<br>barriers | Combined<br>individual-<br>/provider-/<br>system-level<br>barrier |
|--------------------------------------------|---------------------------------------------------------------------------------------|---------------------|---------------------------|------------------------------------------------------------------------------------------------------------------------------------------------------------------------------------------------------------------|-------------------------------------------|--------------------------------------------------------------------------------------------------------------------------------------------------------|------------------------------|---------------------------|----------|--------|---------------------------------------------------------------------------------------------------------------------------------------------------------------------------------------------------------------------------------------------------------------------------------------------------------------------------------------------------------------------------------------------------------------|------------------|----------------------------------------|-------------------------------------------------------------------|
|                                            |                                                                                       |                     |                           |                                                                                                                                                                                                                  |                                           |                                                                                                                                                        |                              | Financial                 | Physical | Stigma | Health literacy                                                                                                                                                                                                                                                                                                                                                                                               | Sociodemographic |                                        |                                                                   |
| Date<br>2005<br>Yemen<br>Rural             | Cross-sectional<br>74<br>44.6%<br>-:                                                  | SSM+ PTB<br>cases   | -                         | -                                                                                                                                                                                                                | -                                         | -                                                                                                                                                      | -                            | -                         | -        | -      | 27% of men and 73%<br>of women were<br>illiterate (p=0.12)<br>Illiteracy was a<br>predictor of longer<br>diagnostic delay (OR<br>= 2.9, p = 0.046).<br>Literate females were<br>least likely to have<br>diagnostic delays<br>AND treatment not<br>completed (p <<br>0.001), and illiterate<br>males were most<br>likely to have<br>diagnostic delay AND<br>treatment not<br>completed (OR 6.4, p<br>= 0.008). | -                | -                                      | -                                                                 |
| Diez<br>2005<br>Spain<br>Mixed             | Cross-sectional<br>5184<br>29.7%<br>-                                                 | TB cases            | -                         | Women were<br>significantly<br>associated<br>with extreme<br>health system<br>delay (OR<br>1.26, 95% CI<br>1.04-1.49), but<br>not with delay<br>longer than<br>50th percentile<br>(OR 1.12, 95%<br>CI 0.97-1.29) | #                                         | -                                                                                                                                                      | -                            | -                         | -        | -      | -                                                                                                                                                                                                                                                                                                                                                                                                             | -                | -                                      | -                                                                 |
| dos Santos<br>2005<br>Brazil<br>Urban      | Cross-sectional<br>1105<br>33.0%<br>-                                                 | TB cases            | -                         | -                                                                                                                                                                                                                | -                                         | Sex was not<br>associated<br>with total<br>delay in TB<br>treatment<br>(OR of delay<br>for women<br>vs men:<br>1.18, 95% CI<br>0.91-1.53,<br>p=0.1884) | ^                            | -                         | -        | -      | -                                                                                                                                                                                                                                                                                                                                                                                                             | -                | -                                      | -                                                                 |
| Katamba<br>2005<br>Uganda<br>Rural         | Cross-sectional<br>307<br>31.6%<br>Mean (SD): DOTS:<br>35.1(13.4); SAT:<br>35.2(12.0) | TB patients         | -                         | -                                                                                                                                                                                                                | -                                         | -                                                                                                                                                      | -                            | -                         | -        | -      | No significant<br>difference in the<br>belief that TB is<br>associated with<br>HIV/AIDS (p=0.694)                                                                                                                                                                                                                                                                                                             | -                | -                                      | -                                                                 |

### TableS1. Summary of included studies

[illegible]

TableS1. Summary of included studies

| First Author<br>Year<br>Country<br>Setting | Type of study<br>Sample size (N)<br>(% female)<br>Age(years)   | Study<br>population         | Individual-level<br>delay                                                                                                                                                           | Provider-<br>/system-level<br>delay                                                                                | Type of<br>provider-<br>/system-<br>delay | Combined<br>individual-<br>/provider-/<br>system-level<br>delay | Type of<br>combined<br>delay | Individual-level barriers                                                                                                                                                                                            |          |                                                                                                                                                                                                                                                                                                                                                                                                                                                                                   |                 |                                                                                   | Provider-<br>/system-level<br>barriers                                                                                                                                                                                                                                                                                                                                                                                                                                                        | Combined<br>individual-<br>/provider-/<br>system-level<br>barrier |
|--------------------------------------------|----------------------------------------------------------------|-----------------------------|-------------------------------------------------------------------------------------------------------------------------------------------------------------------------------------|--------------------------------------------------------------------------------------------------------------------|-------------------------------------------|-----------------------------------------------------------------|------------------------------|----------------------------------------------------------------------------------------------------------------------------------------------------------------------------------------------------------------------|----------|-----------------------------------------------------------------------------------------------------------------------------------------------------------------------------------------------------------------------------------------------------------------------------------------------------------------------------------------------------------------------------------------------------------------------------------------------------------------------------------|-----------------|-----------------------------------------------------------------------------------|-----------------------------------------------------------------------------------------------------------------------------------------------------------------------------------------------------------------------------------------------------------------------------------------------------------------------------------------------------------------------------------------------------------------------------------------------------------------------------------------------|-------------------------------------------------------------------|
|                                            |                                                                |                             |                                                                                                                                                                                     |                                                                                                                    |                                           |                                                                 |                              | Financial                                                                                                                                                                                                            | Physical | Stigma                                                                                                                                                                                                                                                                                                                                                                                                                                                                            | Health literacy | Sociodemographic                                                                  |                                                                                                                                                                                                                                                                                                                                                                                                                                                                                               |                                                                   |
| Xu<br>2005<br>China<br>Rural               | Cross-sectional<br>493<br>27.8%<br>Median: 40-59 years         | TB cases                    | No significant<br>difference in<br>patient delay in<br>two counties<br>between male<br>and female TB<br>cases.                                                                      | No significant<br>difference in<br>doctor's delay<br>in two<br>counties<br>between male<br>and female TB<br>cases. | *                                         | -                                                               | -                            | -                                                                                                                                                                                                                    | -        | -                                                                                                                                                                                                                                                                                                                                                                                                                                                                                 | -               | -                                                                                 | -                                                                                                                                                                                                                                                                                                                                                                                                                                                                                             | -                                                                 |
| Yimer<br>2005<br>Ethiopia<br>Rural         | Cross-sectional<br>384<br>47.4%<br>Median(range)=28(16-<br>70) | New SSM+<br>PTB<br>patients | No significant<br>gender<br>differences in<br>patient delay                                                                                                                         | Provider delay<br>did not vary<br>by gender                                                                        | #                                         | -                                                               | -                            | -                                                                                                                                                                                                                    | -        | -                                                                                                                                                                                                                                                                                                                                                                                                                                                                                 | -               | -                                                                                 | -                                                                                                                                                                                                                                                                                                                                                                                                                                                                                             | -                                                                 |
| Ahsan<br>2004<br>Bangladesh<br>Rural       | Cross-sectional<br>307<br>52.8%<br>Mean= 36 (range 15-<br>90)  | TB cases                    | A larger<br>proportion of<br>those who<br>delayed for 14-<br>60 days were<br>men. Of those<br>who had > 60<br>days delay,<br>50% were<br>women whereas<br>only 29.8%<br>were males. | -                                                                                                                  | -                                         | -                                                               | -                            | More women than men<br>were<br>unemployed/housewives,<br>which predicted health<br>seeking.<br>More females than males<br>reported difficulties<br>paying for travel to<br>access care (83.3% vs<br>66.2%, p<0.001). | -        | More females than<br>males wanted to be<br>diagnosed secretly<br>(82.7% vs 23.4%,<br>p<0.001).<br>Women were more<br>likely than men to<br>report problems in the<br>relationship with their<br>spouse (72.1% vs<br>49.2%, p<0.001); to<br>report problems in<br>their relationship with<br>other family members<br>(77.2% vs 36.6%,<br>p<0.001). Men were<br>more likely than<br>women to report<br>difficulty in finding a<br>marriage partner<br>(64.1% vs 45.7%,<br>p=0.001). | -               | More women than men were<br>unmarried, which predicted<br>against health seeking. | More women<br>than men were<br>uncomfortable<br>with clinic<br>hours or<br>dissatisfied<br>with<br>provider's<br>behavior/TB<br>services, both<br>of which were<br>predictors of<br>health seeking.<br>Fewer females<br>than males<br>reported<br>satisfaction<br>with clinic<br>hours (69.8%<br>vs 78.6%,<br>p=0.077);<br>satisfaction<br>with<br>providers'<br>behaviors<br>(61.1% vs<br>75.2%,<br>p=0.009); and<br>satisfaction<br>with TB<br>services<br>(65.4% vs<br>75.9%,<br>p=0.046). | -                                                                 |

TableS1. Summary of included studies

| First Author<br>Year<br>Country<br>Setting  | Type of study<br>Sample size (N)<br>(% female)<br>Age(years)               | Study<br>population                                                                                                 | Individual-level<br>delay                                                                                   | Provider-<br>/system-level<br>delay                                                                                                                                                                                                                              | Type of<br>provider-<br>/system-<br>delay | Combined<br>individual-<br>/provider-/<br>system-level<br>delay | Type of<br>combined<br>delay | Individual-level barriers                                                                                                                                                                                                                                       |          |                                                                                                                                                                                                                                                                                                                    |                                                                                                                                                                                                                                                                                                                               |                  | Provider-<br>/system-level<br>barriers | Combined<br>individual-<br>/provider-/<br>system-level<br>barrier                                                                                                                                              |
|---------------------------------------------|----------------------------------------------------------------------------|---------------------------------------------------------------------------------------------------------------------|-------------------------------------------------------------------------------------------------------------|------------------------------------------------------------------------------------------------------------------------------------------------------------------------------------------------------------------------------------------------------------------|-------------------------------------------|-----------------------------------------------------------------|------------------------------|-----------------------------------------------------------------------------------------------------------------------------------------------------------------------------------------------------------------------------------------------------------------|----------|--------------------------------------------------------------------------------------------------------------------------------------------------------------------------------------------------------------------------------------------------------------------------------------------------------------------|-------------------------------------------------------------------------------------------------------------------------------------------------------------------------------------------------------------------------------------------------------------------------------------------------------------------------------|------------------|----------------------------------------|----------------------------------------------------------------------------------------------------------------------------------------------------------------------------------------------------------------|
|                                             |                                                                            |                                                                                                                     |                                                                                                             |                                                                                                                                                                                                                                                                  |                                           |                                                                 |                              | Financial                                                                                                                                                                                                                                                       | Physical | Stigma                                                                                                                                                                                                                                                                                                             | Health literacy                                                                                                                                                                                                                                                                                                               | Sociodemographic |                                        |                                                                                                                                                                                                                |
| Atre <sup>2</sup><br>2004<br>India<br>Rural | Cross-sectional<br>160<br>50%<br>Mean 39.7                                 | Community<br>members<br>who did not<br>have TB<br>and whose<br>immediate<br>family<br>members<br>did not have<br>TB | -                                                                                                           | -                                                                                                                                                                                                                                                                | -                                         | -                                                               | -                            | Financial problems,<br>including job loss (P <<br>0.1) and reduced family<br>income (P = 0.07), were<br>reported more frequently<br>for the male than for the<br>female vignette.                                                                               | -        | There were no<br>statistically significant<br>gender differences in<br>respondents responses<br>to stigma indicators<br>(tested using male and<br>female vignettes)                                                                                                                                                | There were no gender<br>differences in the<br>ability to recognize<br>TB. Significantly<br>more men (74%) than<br>women (15%)<br>identified the mass<br>media as sources of<br>TB information.<br>(P<0.01). More men<br>(31%) than women<br>(14%) identified<br>health services as a<br>source of TB<br>information (p<0.05). | -                | -                                      | -                                                                                                                                                                                                              |
| Balasubramanian<br>2004<br>India<br>Rural   | Cross-sectional<br>Community:76011<br>TB suspects:8646<br>TB patients:1967 | General<br>population,<br>TB<br>suspects,<br>TB cases                                                               | No gender<br>difference in<br>delay was<br>found. Median<br>delay was 14<br>days for both<br>gender (P=0.2) | Men and<br>women<br>experienced<br>similar health<br>system delays<br>regardless of<br>whether they<br>consulted<br>government<br>provider first<br>(median 15 vs<br>17 days,<br>p=0.6) or<br>private<br>provider first (<br>median 42 vs<br>45 days,<br>p=0.6). | *                                         | -                                                               | -                            | Women spent<br>significantly more money<br>for care seeking than men<br>(500 vs 300 rupees; P<<br>0.001). For both men and<br>women, it cost 5 times<br>more to consult a private<br>provider than a<br>government provider<br>(500 vs 100 rupees; P<<br>0.001) | -        | Women faced<br>significantly greater<br>stigma than men in<br>terms of discussing<br>their illness with<br>family and friends<br>(21% vs 14%,<br>p<0.05), feeling<br>unwelcome to<br>participate in social<br>events (18% vs 12%,<br>p<0.05) or facing<br>rejection due to their<br>illness (4% vs 2%,<br>p<0.05). | -                                                                                                                                                                                                                                                                                                                             |                  | -                                      | Among<br>SSM+ TB<br>patients,<br>women were<br>less likely to<br>be notified<br>(the<br>probability<br>of<br>notification<br>was<br>significantly<br>higher for<br>women than<br>men, 0.54 vs<br>0.33; p<0.01) |



### TableS1. Summary of included studies

[illegible]



TableS1. Summary of included studies

| First Author<br>Year<br>Country<br>Setting | Type of study<br>Sample size (N)<br>(% female)<br>Age(years) | Study<br>population                                             | Individual-level<br>delay                                                                                                 | Provider-<br>/system-level<br>delay                                                                                                     | Type of<br>provider-<br>/system-<br>delay | Combined<br>individual-<br>/provider-/<br>system-level<br>delay                                                                  | Type of<br>combined<br>delay | Individual-level barriers                                                                                                          |          |                                                                                                                             |                 |                  | Provider-<br>/system-level<br>barriers | Combined<br>individual-<br>/provider-/<br>system-level<br>barrier                                                                                                                                                                                                                                                                                                                |
|--------------------------------------------|--------------------------------------------------------------|-----------------------------------------------------------------|---------------------------------------------------------------------------------------------------------------------------|-----------------------------------------------------------------------------------------------------------------------------------------|-------------------------------------------|----------------------------------------------------------------------------------------------------------------------------------|------------------------------|------------------------------------------------------------------------------------------------------------------------------------|----------|-----------------------------------------------------------------------------------------------------------------------------|-----------------|------------------|----------------------------------------|----------------------------------------------------------------------------------------------------------------------------------------------------------------------------------------------------------------------------------------------------------------------------------------------------------------------------------------------------------------------------------|
|                                            |                                                              |                                                                 |                                                                                                                           |                                                                                                                                         |                                           |                                                                                                                                  |                              | Financial                                                                                                                          | Physical | Stigma                                                                                                                      | Health literacy | Sociodemographic |                                        |                                                                                                                                                                                                                                                                                                                                                                                  |
| Paynter<br>2004<br>UK<br>Urban             | Cohort<br>71<br>32.4%<br>Mean=38.1                           | PTB cases                                                       | No significant<br>difference in<br>patient delay<br>(median 26<br>days among<br>men vs 50 days<br>among women<br>p=0.13). | No significant<br>difference in<br>health system<br>delay (median<br>26.5 days<br>among men vs<br>41.5 days<br>among women,<br>p=0.42). | #                                         | No<br>significant<br>difference in<br>total delay<br>(median 77.5<br>days among<br>men vs 93<br>days among<br>women,<br>p=0.53). | ^                            | -                                                                                                                                  | -        | -                                                                                                                           | -               | -                | -                                      | -                                                                                                                                                                                                                                                                                                                                                                                |
| Shetty<br>2004<br>United Kingdom<br>Urban  | Cross-sectional<br>75<br>45.3%<br>-                          | TB patients;<br>household<br>contact;<br>community<br>residents | -                                                                                                                         | -                                                                                                                                       | -                                         | -                                                                                                                                | -                            | -                                                                                                                                  | -        | No significant<br>difference by gender<br>in living and coping<br>with TB and how<br>others related to<br>patients' disease | -               | -                | -                                      | -                                                                                                                                                                                                                                                                                                                                                                                |
| Thorson<br>2004<br>Vietnam<br>Mixed        | Cross-sectional<br>35832<br>53.3%<br>-                       | General<br>population                                           | -                                                                                                                         | -                                                                                                                                       | -                                         | -                                                                                                                                | -                            | No significant difference<br>in the proportion of TB<br>cases in lowest quintile<br>income level by gender<br>(60% vs 67%, p=0.78) | -        | -                                                                                                                           | -               | -                | -                                      | Among self-<br>referred<br>patients (i.e.<br>passive case-<br>finding), the<br>case<br>detection<br>rates were<br>estimated to<br>be 39% (20-<br>76%) among<br>men and<br>12%(6-26%)<br>among<br>women. Men<br>had<br>significantly<br>higher case<br>detection rate<br>(RR 3.3 95%<br>CI 1.9-5.8),<br>suggesting<br>women were<br>under-<br>represented<br>by self-<br>referral |

TableS1. Summary of included studies

| First Author<br>Year<br>Country<br>Setting | Type of study<br>Sample size (N)<br>(% female)<br>Age(years) | Study<br>population      | Individual-level<br>delay | Provider-<br>/system-level<br>delay | Type of<br>provider-<br>/system-<br>delay | Combined<br>individual-<br>/provider-/<br>system-level<br>delay | Type of<br>combined<br>delay | Individual-level barriers |          |        |                                                                                                                                                                                                                                                                                                                                                                    |                  | Provider-<br>/system-level<br>barriers                                                                                                                                                 | Combined<br>individual-<br>/provider-/<br>system-level<br>barrier |
|--------------------------------------------|--------------------------------------------------------------|--------------------------|---------------------------|-------------------------------------|-------------------------------------------|-----------------------------------------------------------------|------------------------------|---------------------------|----------|--------|--------------------------------------------------------------------------------------------------------------------------------------------------------------------------------------------------------------------------------------------------------------------------------------------------------------------------------------------------------------------|------------------|----------------------------------------------------------------------------------------------------------------------------------------------------------------------------------------|-------------------------------------------------------------------|
|                                            |                                                              |                          |                           |                                     |                                           |                                                                 |                              | Financial                 | Physical | Stigma | Health literacy                                                                                                                                                                                                                                                                                                                                                    | Sociodemographic |                                                                                                                                                                                        |                                                                   |
| Agboatwalla<br>2003<br>Pakistan<br>Mixed   | Cross-sectional<br>754<br>49.0%<br>-                         | General<br>population    | -                         | -                                   | -                                         | -                                                               | -                            | -                         | -        | -      | Significantly higher overall literacy of men than women both in urban and rural sites (p<0.05); more men than women knew TB is transmitted through droplet in both sites (p=0.02, 0.02); more urban women than men thought TB is transmitted through sexual contact (14.2% vs 3.1%, p<0.05); men had more knowledge TB symptoms (lesser difference in urban areas) | -                | -                                                                                                                                                                                      | -                                                                 |
| Ailinger<br>2003<br>USA<br>Mixed           | Cross-sectional<br>14727<br>14.1%<br>-                       | General<br>population    | -                         | -                                   | -                                         | -                                                               | -                            | -                         | -        | -      | Gender was slightly associated with knowledge of perceived risk, 23.8% of men and 25.7% of women answered all questions correctly (p < 0.001).                                                                                                                                                                                                                     | -                | -                                                                                                                                                                                      | -                                                                 |
| Harries<br>2003<br>Malawi<br>Mixed         | Cross-sectional<br>329<br>53.5%<br>Mean: 36                  | Hospitalized<br>TB cases | -                         | -                                   | -                                         | -                                                               | -                            | -                         | -        | -      | -                                                                                                                                                                                                                                                                                                                                                                  | -                | No difference in the odds of “exceeding ideal maximal number” of health facility visits by gender for both smear positive (aOR 1.26, p = 0.4) and negative patients (aOR 0.94, p=0.9). | -                                                                 |

TableS1. Summary of included studies

| First Author<br>Year<br>Country<br>Setting | Type of study<br>Sample size (N)<br>(% female)<br>Age(years)                                                                                                          | Study<br>population                            | Individual-level<br>delay                                               | Provider-<br>/system-level<br>delay | Type of<br>provider-<br>/system-<br>delay | Combined<br>individual-<br>/provider-/<br>system-level<br>delay | Type of<br>combined<br>delay | Individual-level barriers |          |        |                                                                                                                                                                                                                                                                                                                                                               |                  | Provider-<br>/system-level<br>barriers                                                                                                | Combined<br>individual-<br>/provider-/<br>system-level<br>barrier |
|--------------------------------------------|-----------------------------------------------------------------------------------------------------------------------------------------------------------------------|------------------------------------------------|-------------------------------------------------------------------------|-------------------------------------|-------------------------------------------|-----------------------------------------------------------------|------------------------------|---------------------------|----------|--------|---------------------------------------------------------------------------------------------------------------------------------------------------------------------------------------------------------------------------------------------------------------------------------------------------------------------------------------------------------------|------------------|---------------------------------------------------------------------------------------------------------------------------------------|-------------------------------------------------------------------|
|                                            |                                                                                                                                                                       |                                                |                                                                         |                                     |                                           |                                                                 |                              | Financial                 | Physical | Stigma | Health literacy                                                                                                                                                                                                                                                                                                                                               | Sociodemographic |                                                                                                                                       |                                                                   |
| Hashim<br>2003<br>Iraq<br>Mixed            | Cross-sectional<br>500 patients<br>500 HCWs<br>Patient: 33.4%<br>Health care worker:<br>22.0%<br>Mean (SD) for<br>patient=36.4 (16.4)<br>75%of HCWs were<br>>30 years | Health care<br>workers and<br>SSM+ TB<br>cases | -                                                                       | -                                   | -                                         | -                                                               | -                            | -                         | -        | -      | Among patients, no<br>significant difference<br>in TB knowledge<br>(65.8% vs 61.7%, chi-<br>squared=0.81);                                                                                                                                                                                                                                                    | -                | Among health<br>care workers,<br>lower<br>proportion of<br>women had<br>good<br>knowledge<br>(96.4% vs<br>99.0%, non-<br>significant) | -                                                                 |
| Hoa<br>2003<br>Vietnam<br>Rural            | Cross-sectional<br>559<br>53.7%<br>56% between 25-64                                                                                                                  | TB suspects                                    | Women<br>significantly<br>had more<br>healthcare<br>action<br>(p<0.001) | -                                   | -                                         | -                                                               | -                            | -                         | -        | -      | More women than<br>men were illiterate<br>(15% vs 4%,<br>p<0.001);<br>significantly higher<br>mean knowledge<br>score in men than<br>women (3.04 vs 2.55,<br>p<0.001); more men<br>knew TB is<br>transmitted through<br>droplet (p=0.04);<br>knowledge of TB<br>symptoms was<br>associated with<br>increased healthcare<br>action or seeking<br>hospital care | -                | -                                                                                                                                     | -                                                                 |

**TableS1. Summary of included studies**

[illegible]

TableS1. Summary of included studies

| First Author<br>Year<br>Country<br>Setting  | Type of study<br>Sample size (N)<br>(% female)<br>Age(years) | Study<br>population  | Individual-level<br>delay                                                                                                                                                                                                                             | Provider-<br>/system-level<br>delay                        | Type of<br>provider-<br>/system-<br>delay | Combined<br>individual-<br>/provider-/<br>system-level<br>delay | Type of<br>combined<br>delay | Individual-level barriers                                                        |                                                         |                                                                                    |                                                                                                                                                                                               |                  | Provider-<br>/system-level<br>barriers | Combined<br>individual-<br>/provider-/<br>system-level<br>barrier |
|---------------------------------------------|--------------------------------------------------------------|----------------------|-------------------------------------------------------------------------------------------------------------------------------------------------------------------------------------------------------------------------------------------------------|------------------------------------------------------------|-------------------------------------------|-----------------------------------------------------------------|------------------------------|----------------------------------------------------------------------------------|---------------------------------------------------------|------------------------------------------------------------------------------------|-----------------------------------------------------------------------------------------------------------------------------------------------------------------------------------------------|------------------|----------------------------------------|-------------------------------------------------------------------|
|                                             |                                                              |                      |                                                                                                                                                                                                                                                       |                                                            |                                           |                                                                 |                              | Financial                                                                        | Physical                                                | Stigma                                                                             | Health literacy                                                                                                                                                                               | Sociodemographic |                                        |                                                                   |
| Demissie<br>2002<br>Ethiopia<br>Urban       | Cross-sectional<br>700<br>46.9%<br>Mean= 31                  | PTB cases            | SSM+: Females had 0.98 the odds of longer delays than males, but this was not statistically significant (CI 0.61-1.57)<br>SSM-: Females had 1.1 times the odds of longer delays than males but this was not statistically significant(CI= 0.72-1.69). | -                                                          | -                                         | -                                                               | -                            | -                                                                                | -                                                       | -                                                                                  | -                                                                                                                                                                                             | -                | -                                      | -                                                                 |
| Dhingra<br>2002<br>India<br>Urban           | Cross-sectional<br>301<br>46.8%<br>-:                        | PTB cases            | No gender difference in delays was found                                                                                                                                                                                                              | -                                                          | -                                         | -                                                               | -                            | -                                                                                | -                                                       | -                                                                                  | -                                                                                                                                                                                             | -                | -                                      | -                                                                 |
| Godfrey-Faussett<br>2002<br>Zambia<br>Urban | Cross-sectional<br>427<br>59.5%<br>68% between 20-39         | TB suspects          | No significant difference in patient delay. (38.2% for men vs 32.7% for women, p=0.29)                                                                                                                                                                | -                                                          | -                                         | -                                                               | -                            | Sex was not associated with socio-economic factors (p=0.6)                       | Sex was not associated with distance to clinic (p=0.1). | Sex was significantly associated with stigma (p=0.019, direction was not reported) | Sex was not associated with knowledge of TB (p=0.93), but was associated with education (p=0.00007, direction not reported); poor TB knowledge was associated with increased stigma (p=0.004) | -                | -                                      | -                                                                 |
| Malhotra<br>2002<br>India<br>Rural          | Cross-Sectional<br>213<br>52.1%<br>Mean=43.02; range: 20-90  | General population   | -                                                                                                                                                                                                                                                     | -                                                          | -                                         | -                                                               | -                            | -                                                                                | -                                                       | -                                                                                  | Males significantly more than women were aware about symptoms, mode of spread, and etiology of TB                                                                                             | -                | -                                      | -                                                                 |
| Masjedi<br>2002<br>Iran<br>Urban            | Cross-sectional<br>50<br>60%<br>Mean(SD)=42(19)              | New SSM+<br>TB cases | Men had longer patient delays (mean 15.5 vs 10.5 days, p=0.12)                                                                                                                                                                                        | Women had longer physician delays (108 vs 70 days, p<0.05) | *, @                                      | -                                                               | -                            | 13% of women delayed seeking medical advice due to dependence on their husbands. | -                                                       | -                                                                                  | -                                                                                                                                                                                             | -                | -                                      | -                                                                 |

TableS1. Summary of included studies

| First Author<br>Year<br>Country<br>Setting | Type of study<br>Sample size (N)<br>(% female)<br>Age(years) | Study<br>population   | Individual-level<br>delay                                                                                                                                                                                        | Provider-<br>/system-level<br>delay                                                                                                                                        | Type of<br>provider-<br>/system-<br>delay | Combined<br>individual-<br>/provider-/<br>system-level<br>delay | Type of<br>combined<br>delay | Individual-level barriers |          |        |                 |                  | Provider-<br>/system-level<br>barriers | Combined<br>individual-<br>/provider-/<br>system-level<br>barrier |
|--------------------------------------------|--------------------------------------------------------------|-----------------------|------------------------------------------------------------------------------------------------------------------------------------------------------------------------------------------------------------------|----------------------------------------------------------------------------------------------------------------------------------------------------------------------------|-------------------------------------------|-----------------------------------------------------------------|------------------------------|---------------------------|----------|--------|-----------------|------------------|----------------------------------------|-------------------------------------------------------------------|
|                                            |                                                              |                       |                                                                                                                                                                                                                  |                                                                                                                                                                            |                                           |                                                                 |                              | Financial                 | Physical | Stigma | Health literacy | Sociodemographic |                                        |                                                                   |
| Rajeswari<br>2002<br>India<br>Mixed        | Cross-sectional<br>531<br>28.1%<br>Mean(range)=38(15-80)     | SSM+ new<br>PTB cases | Men waited somewhat longer than women to seek care (20 vs 15 days. P= 0.07) A significantly higher proportion of women (77%) than men (68%) sought care within 30 days of onset of symptoms.(X2= 4.3, P= 0.0382) | No significant difference in median health system delay (M 23 days vs F 30 days).No significant difference in the proportion of diagnosed > 7 days (M 68% vs F 73% p=0.18) | *                                         | -                                                               | -                            |                           | -        | -      | -               | -                | -                                      | -                                                                 |



TableS1. Summary of included studies

| First Author<br>Year<br>Country<br>Setting | Type of study<br>Sample size (N)<br>(% female)<br>Age(years)        | Study<br>population   | Individual-level<br>delay | Provider-<br>/system-level<br>delay | Type of<br>provider-<br>/system-<br>delay | Combined<br>individual-<br>/provider-/<br>system-level<br>delay                                                     | Type of<br>combined<br>delay | Individual-level barriers |          |                                                                                                                                                                                                                                                                                                                                                                                                                                                                                                                                                                                                                                                                                                                                                                           |                                                                                                                |                  | Provider-<br>/system-level<br>barriers                                        | Combined<br>individual-<br>/provider-/<br>system-level<br>barrier |
|--------------------------------------------|---------------------------------------------------------------------|-----------------------|---------------------------|-------------------------------------|-------------------------------------------|---------------------------------------------------------------------------------------------------------------------|------------------------------|---------------------------|----------|---------------------------------------------------------------------------------------------------------------------------------------------------------------------------------------------------------------------------------------------------------------------------------------------------------------------------------------------------------------------------------------------------------------------------------------------------------------------------------------------------------------------------------------------------------------------------------------------------------------------------------------------------------------------------------------------------------------------------------------------------------------------------|----------------------------------------------------------------------------------------------------------------|------------------|-------------------------------------------------------------------------------|-------------------------------------------------------------------|
|                                            |                                                                     |                       |                           |                                     |                                           |                                                                                                                     |                              | Financial                 | Physical | Stigma                                                                                                                                                                                                                                                                                                                                                                                                                                                                                                                                                                                                                                                                                                                                                                    | Health literacy                                                                                                | Sociodemographic |                                                                               |                                                                   |
| Getahun<br>2001<br>Ethiopia<br>Rural       | Cross-sectional<br>1000<br>25.6%<br>Mean= 40.1(SD 10.8)             | General<br>population | -                         | -                                   | -                                         | -                                                                                                                   | -                            | -                         | -        | Significantly higher proportion of males than females would allow home visits from TB patients on treatment. (36.4% vs 26.2%; X <sup>2</sup> = 8.9; P= 0.002); to continue marriage if spouse develops TB. (70.2% vs 66%; X <sup>2</sup> = 53.1; P= 0.0001); to shake hands with a TB patient (24.9% vs 13.3%, x <sup>2</sup> =14.9 p=0.001); to attend social gathering with TB patients on treatment on the open field (25% vs 19.5% x <sup>2</sup> =3.2 p=0.075) Higher but not statistically significant proportion of males than females would allow siblings to play with children from a TB family (9.1% vs 6.2% x <sup>2</sup> =2.1 p=0.15); to attend social gathering with TB patient on treatment on the same room (14.6% vs 12.1% x <sup>2</sup> =1.0 p=0.31) | A lower proportion of females than males believed TB is curable. (57% vs 70%; X <sup>2</sup> = 14.5; P= 0.001) | -                | -                                                                             | -                                                                 |
| Lienhardt<br>2001<br>The Gambia<br>Mixed   | Cross-sectional<br>152<br>27.6%<br>Mean=36 for men and 30 for women | TB cases              | -                         | -                                   | -                                         | No significant difference by gender in total delay (aHR of delay among men vs women 0.74, 95% CI 0.34-1.62, p=0.46) | ^                            | -                         | -        | -                                                                                                                                                                                                                                                                                                                                                                                                                                                                                                                                                                                                                                                                                                                                                                         | -                                                                                                              | -                | Women had seen a significantly higher number of healthcare providers (p=0.01) | -                                                                 |

TableS1. Summary of included studies

| First Author<br>Year<br>Country<br>Setting     | Type of study<br>Sample size (N)<br>(% female)<br>Age(years)                                | Study<br>population           | Individual-level<br>delay                                                                                                                     | Provider-<br>/system-level<br>delay                                                                                            | Type of<br>provider-<br>/system-<br>delay | Combined<br>individual-<br>/provider-/<br>system-level<br>delay                                                                                                 | Type of<br>combined<br>delay | Individual-level barriers                                                                                              |                                                                                                                                     |        |                                                                                                                 |                                                                                                                                                                                                                                                                                                                                                                                  | Provider-<br>/system-level<br>barriers | Combined<br>individual-<br>/provider-<br>/system-level<br>barrier |
|------------------------------------------------|---------------------------------------------------------------------------------------------|-------------------------------|-----------------------------------------------------------------------------------------------------------------------------------------------|--------------------------------------------------------------------------------------------------------------------------------|-------------------------------------------|-----------------------------------------------------------------------------------------------------------------------------------------------------------------|------------------------------|------------------------------------------------------------------------------------------------------------------------|-------------------------------------------------------------------------------------------------------------------------------------|--------|-----------------------------------------------------------------------------------------------------------------|----------------------------------------------------------------------------------------------------------------------------------------------------------------------------------------------------------------------------------------------------------------------------------------------------------------------------------------------------------------------------------|----------------------------------------|-------------------------------------------------------------------|
|                                                |                                                                                             |                               |                                                                                                                                               |                                                                                                                                |                                           |                                                                                                                                                                 |                              | Financial                                                                                                              | Physical                                                                                                                            | Stigma | Health literacy                                                                                                 | Sociodemographic                                                                                                                                                                                                                                                                                                                                                                 |                                        |                                                                   |
| Needham<br>2001<br>Zambia<br>Urban             | Cross-sectional<br>202<br>44.0%<br>53% <32                                                  | TB cases                      | -                                                                                                                                             | -                                                                                                                              | -                                         | Delay from<br>symptom<br>onset to<br>initiation of<br>treatment<br>was<br>significantly<br>longer in<br>women than<br>men (72<br>days vs 58<br>days,<br>p=0.02) | ^                            | -                                                                                                                      | -                                                                                                                                   | -      | -                                                                                                               | -                                                                                                                                                                                                                                                                                                                                                                                | -                                      | -                                                                 |
| Ngamvithayapong<br>2001<br>Thailand<br>Unknown | Cross-sectional<br>557<br>33.7%<br>Median=37                                                | New SSM+<br>TB cases          | Women had<br>longer patient<br>delay<br>(aOR=1.04,<br>95%CI 0.69-<br>1.58)                                                                    | Women had<br>longer<br>provider delay<br>(univariate<br>OR=1.43,<br>95%CI 1.01-<br>2.04)                                       | *                                         | -                                                                                                                                                               | -                            | Significantly higher<br>proportion of women<br>than men were<br>unemployed/had no<br>income (37.2% vs 26.5%<br>p=0.03) | -                                                                                                                                   | -      | No significant<br>difference by gender<br>in proportion of being<br>illiterate( M 21.7% vs<br>F 28.7% , p=0.10) | -                                                                                                                                                                                                                                                                                                                                                                                | -                                      | -                                                                 |
| Pronyk<br>2001<br>South Africa<br>Rural        | Cross-sectional<br>298<br>40.6%<br>Mean(SD)=40.4(15.5)                                      | Hospitalized<br>PTB cases     | No significant<br>difference in<br>patient delay<br>(F/M HR 1.00<br>95% CI 0.78-<br>1.26)                                                     | Women had<br>longer service<br>provider delay<br>(F/M HR 0.64<br>95% CI 0.49-<br>0.83, p<0.05)                                 | *                                         | -                                                                                                                                                               | -                            | -                                                                                                                      | -                                                                                                                                   | -      | -                                                                                                               | -                                                                                                                                                                                                                                                                                                                                                                                | -                                      | -                                                                 |
| Sadiq<br>2001<br>Pakistan<br>Mixed             | Cross-sectional<br>160<br>47.0%<br>Mean(SD)=33(16.6)                                        | New<br>registered<br>TB cases | No significant<br>difference in<br>patient delay<br>(p=0.19)                                                                                  | -                                                                                                                              | -                                         | -                                                                                                                                                               | -                            | No significant<br>difference in<br>mean travel cost<br>(p=0.45)                                                        | No significant<br>difference in<br>travel time and<br>distance from<br>residence to TB<br>center (p=0.44,<br>0.58,<br>respectively) | -      | -                                                                                                               | -                                                                                                                                                                                                                                                                                                                                                                                | -                                      | -                                                                 |
| Ward<br>2001<br>Australia<br>Mixed             | Cross-sectional<br>781<br>42.4%-42.6%<br>Mean= 54.8 years<br>among men; 46.1<br>among women | TB cases                      | All TB: No<br>significant<br>difference in<br>patient delay<br>(M/F aRR 0.93<br>95% CI 0.80-<br>1.08).<br>SSM+ TB: OR<br>1.02 (0.81-<br>1.27) | All TB: Men<br>had shorter<br>system delay<br>(M/F aRR<br>0.78 95% CI<br>0.68-0.91)<br><br>SSM+ TB: OR<br>0.78 (0.63-<br>0.97) | #                                         | -                                                                                                                                                               | -                            | -                                                                                                                      | -                                                                                                                                   | -      | -                                                                                                               | Stratification of sex by age<br>dichotomized at 45 years<br>and risk group showed that<br>That the principal source of<br>age-corrected difference<br>between females and males<br>for health care system delays<br>was in the non-indigenous<br>Australian-born group.<br>Females aged 45 and over in<br>this group had significantly<br>longer times to diagnosis<br>(P<0.01). | -                                      | -                                                                 |

TableS1. Summary of included studies

| First Author<br>Year<br>Country<br>Setting         | Type of study<br>Sample size (N)<br>(% female)<br>Age(years)             | Study<br>population                         | Individual-level<br>delay                                                                                                                             | Provider-<br>/system-level<br>delay                                                                           | Type of<br>provider-<br>/system-<br>delay | Combined<br>individual-<br>/provider-/<br>system-level<br>delay                                       | Type of<br>combined<br>delay | Individual-level barriers                                                                                         |                                                                                                                                                                |        |                                                                                                                                                                                                                                              |                  | Provider-<br>/system-level<br>barriers                                                                                                                                                                                 | Combined<br>individual-<br>/provider-/<br>system-level<br>barrier |
|----------------------------------------------------|--------------------------------------------------------------------------|---------------------------------------------|-------------------------------------------------------------------------------------------------------------------------------------------------------|---------------------------------------------------------------------------------------------------------------|-------------------------------------------|-------------------------------------------------------------------------------------------------------|------------------------------|-------------------------------------------------------------------------------------------------------------------|----------------------------------------------------------------------------------------------------------------------------------------------------------------|--------|----------------------------------------------------------------------------------------------------------------------------------------------------------------------------------------------------------------------------------------------|------------------|------------------------------------------------------------------------------------------------------------------------------------------------------------------------------------------------------------------------|-------------------------------------------------------------------|
|                                                    |                                                                          |                                             |                                                                                                                                                       |                                                                                                               |                                           |                                                                                                       |                              | Financial                                                                                                         | Physical                                                                                                                                                       | Stigma | Health literacy                                                                                                                                                                                                                              | Sociodemographic |                                                                                                                                                                                                                        |                                                                   |
| Yamasaki-<br>Nakagawa<br>2001<br>Nepal<br>Rural    | Cross-sectional<br>336<br>29.0%<br>Median=37 for men<br>and 30 for women | TB cases:<br>SSM+,<br>SSM-,<br>EPTB         | No significant<br>difference in<br>patient delay by<br>gender (0.8<br>month for men<br>vs 0.6 month<br>for women,<br>p=0.7);                          | Women had<br>slightly more<br>health<br>provider delay<br>than men (1.3<br>month vs 0.8<br>month,<br>p=0.054) | *                                         | Women had<br>longer total<br>delay than<br>men (median<br>3.3 months<br>vs. 2.3<br>months<br>p=0.034) | \$                           | No significant difference<br>by gender in fee paid to<br>health care providers<br>before TB diagnosis<br>(p=0.36) | No significant<br>difference by<br>gender in<br>travelling time<br>to<br>governmental<br>medical<br>establishment<br>where patients<br>got treated<br>(p=0.35) | -      | -                                                                                                                                                                                                                                            | -                | -                                                                                                                                                                                                                      | -                                                                 |
| Thorson<br>2000<br>Vietnam<br>Unknown              | Cross-sectional<br>492<br>56.7%<br>-                                     | TB suspects<br>from<br>population<br>survey | Being a woman<br>was associated<br>with longer<br>delay to first<br>hospital visit                                                                    | -                                                                                                             | -                                         | -                                                                                                     | -                            | Male is significantly<br>associated with a higher<br>total cost per health care<br>action (p=0.01)                | -                                                                                                                                                              | -      | -                                                                                                                                                                                                                                            | -                | Significantly<br>more men than<br>women<br>reported<br>giving a<br>sputum<br>sample at<br>hospital (36%<br>vs 14%,<br>p=0.0006);<br>women were<br>associated<br>with increased<br>number of<br>care-seeking<br>actions | -                                                                 |
| Wandwalo <sup>5</sup><br>2000<br>Tanzania<br>Mixed | Cross-sectional<br>296<br>33.4%<br>Mean (SD)= 36.2 (12)                  | SSM+ TB<br>cases                            | No significant<br>difference in<br>patient delay<br>(p=0.854); no<br>significant<br>different in<br>patient delay<br>longer than 30<br>days (p=0.469) | -                                                                                                             | -                                         | There were<br>no<br>significant<br>gender<br>differences<br>in delays.                                | ^                            | -                                                                                                                 | -                                                                                                                                                              | -      | -                                                                                                                                                                                                                                            | -                | -                                                                                                                                                                                                                      | -                                                                 |
| Wandwalo <sup>5</sup><br>2000<br>Tanzania<br>Mixed | Cross-sectional<br>296<br>33.4%<br>Mean (SD)=36.2 (12)                   | New SSM+<br>PTB cases                       | -                                                                                                                                                     | -                                                                                                             | -                                         | -                                                                                                     | -                            | -                                                                                                                 | -                                                                                                                                                              | -      | No significant<br>difference about<br>knowledge of TB<br>symptom/sign<br>(p=0.398),knowledge<br>of cause and<br>transmission<br>(p=0.889), and overall<br>satisfactory<br>knowledge of TB<br>(F/M aOR 1.64 95%<br>CI 0.89-3.01,<br>p=0.114). | -                | -                                                                                                                                                                                                                      | -                                                                 |

### TableS1. Summary of included studies

[illegible]

**TableS1. Summary of included studies**

[illegible]

### TableS1. Summary of included studies

[illegible]

TableS1. Summary of included studies

| First Author<br>Year<br>Country<br>Setting | Type of study<br>Sample size (N)<br>(% female)<br>Age(years) | Study<br>population | Individual-level<br>delay | Provider-<br>/system-level<br>delay                                                                                                                  | Type of<br>provider-<br>/system-<br>delay | Combined<br>individual-<br>/provider-/<br>system-level<br>delay                                                                                                                                                                                                   | Type of<br>combined<br>delay | Individual-level barriers |                                                                                                                                              |        |                                                                                                                                                                                                                                                                                                                    |                  | Provider-<br>/system-level<br>barriers | Combined<br>individual-<br>/provider-<br>/system-level<br>barrier |
|--------------------------------------------|--------------------------------------------------------------|---------------------|---------------------------|------------------------------------------------------------------------------------------------------------------------------------------------------|-------------------------------------------|-------------------------------------------------------------------------------------------------------------------------------------------------------------------------------------------------------------------------------------------------------------------|------------------------------|---------------------------|----------------------------------------------------------------------------------------------------------------------------------------------|--------|--------------------------------------------------------------------------------------------------------------------------------------------------------------------------------------------------------------------------------------------------------------------------------------------------------------------|------------------|----------------------------------------|-------------------------------------------------------------------|
|                                            |                                                              |                     |                           |                                                                                                                                                      |                                           |                                                                                                                                                                                                                                                                   |                              | Financial                 | Physical                                                                                                                                     | Stigma | Health literacy                                                                                                                                                                                                                                                                                                    | Sociodemographic |                                        |                                                                   |
| Jiménez-Corona<br>2006<br>Mexico<br>Mixed  | Cohort<br>623<br>41.1%<br>Mean(SD)=<br>44.3(17.8)            | TB cases            | -                         | No significant<br>difference in<br>the interval<br>between<br>diagnosis and<br>initiation of<br>treatment<br>(men: 0.20vs<br>women: 0.02,<br>p=0.22) | @                                         | No<br>significant<br>difference<br>between<br>initiation of<br>symptoms<br>and<br>diagnosis in<br>months<br>(men: 2.90<br>vs women<br>2.78,<br>p=0.46), and<br>between<br>initiation of<br>symptoms<br>and<br>treatment<br>(men 3.5o vs<br>women 3.25,<br>p=0.18) | ^, \$                        | -                         | No significant<br>difference in<br>distance to<br>nearest health<br>centre (687<br>meters for men<br>vs 705 meters<br>for women,<br>p=0.24). | -      | -                                                                                                                                                                                                                                                                                                                  | -                | -                                      | -                                                                 |
| Rajeswari<br>2005<br>India<br>Unknown      | Cohort<br>610<br>33.7%<br>54% males and 57%<br>females<=45   | TB cases            | -                         | -                                                                                                                                                    | -                                         | -                                                                                                                                                                                                                                                                 | -                            | -                         | -                                                                                                                                            | -      | Women had lower<br>literacy (52% vs 70%,<br>p=0.0001); no overall<br>significant difference<br>in knowledge of TB<br>etiology and mode of<br>transmission<br>(p=0.106, 0.194); no<br>significant difference<br>in correct recognition<br>of infection as TB<br>etiology (12% of men<br>vs 16% of women,<br>p>0.05) | -                | -                                      | -                                                                 |

**TableS1. Summary of included studies**

[illegible]



### TableS1. Summary of included studies

[illegible]

TableS1. Summary of included studies

| First Author<br>Year<br>Country<br>Setting | Type of study<br>Sample size (N)<br>(% female)<br>Age(years) | Study<br>population                                           | Individual-level<br>delay | Provider-<br>/system-level<br>delay | Type of<br>provider-<br>/system-<br>delay | Combined<br>individual-<br>/provider-/<br>system-level<br>delay | Type of<br>combined<br>delay | Individual-level barriers |          |        |                                                                                                                                                                                                                                                                                                  |                  | Provider-<br>/system-level<br>barriers | Combined<br>individual-<br>/provider-/<br>system-level<br>barrier                                                                                                                                                                                                                         |
|--------------------------------------------|--------------------------------------------------------------|---------------------------------------------------------------|---------------------------|-------------------------------------|-------------------------------------------|-----------------------------------------------------------------|------------------------------|---------------------------|----------|--------|--------------------------------------------------------------------------------------------------------------------------------------------------------------------------------------------------------------------------------------------------------------------------------------------------|------------------|----------------------------------------|-------------------------------------------------------------------------------------------------------------------------------------------------------------------------------------------------------------------------------------------------------------------------------------------|
|                                            |                                                              |                                                               |                           |                                     |                                           |                                                                 |                              | Financial                 | Physical | Stigma | Health literacy                                                                                                                                                                                                                                                                                  | Sociodemographic |                                        |                                                                                                                                                                                                                                                                                           |
| Datiko<br>2009<br>Ethiopia<br>Rural        | Cluster randomized<br>trial<br>296811<br>47.9%<br>-          | General<br>population<br>and self-<br>referred TB<br>suspects | -                         | -                                   | -                                         | -                                                               | -                            | -                         | -        | -      | -                                                                                                                                                                                                                                                                                                | -                | -                                      | Mean case<br>detection rate<br>was higher in<br>intervention<br>kebeles<br>(122.2% vs<br>69.4%,<br>p<0.001) and<br>for female<br>patients<br>(149% vs<br>91.6%,<br>p<0.001); the<br>improvement<br>of case<br>detection rate<br>was<br>significantly<br>more for<br>women than<br>for men |
| Khan<br>2007<br>Pakistan<br>Urban          | Pragmatic randomized<br>clinical trial<br>3055<br>48.9%      | TB suspects<br>referred by<br>physicians<br>or by the<br>NTP  | -                         | -                                   | -                                         | -                                                               | -                            | -                         | -        | -      | Brief instruction<br>significantly<br>increased sputum<br>smear positive rate<br>among women,<br>increased a second<br>early morning sputum<br>specimen submission<br>and decreased rate of<br>saliva seen in<br>submitted samples.<br>The significant<br>differences were not<br>seen among men | -                | -                                      | -                                                                                                                                                                                                                                                                                         |

Legend& Footnote:

-: Not reported; **M**: male; **F**: female; **SD**: standard deviation; **CI**: confidence interval; **TB**: tuberculosis; **PTB**: pulmonary tuberculosis; **EPTB**: extrapulmonary tuberculosis; **SSM+**: sputum smear positive; **SSM-**: sputum smear negative; **HIV**: human immunodeficiency virus; **AIDS**: acquired immunodeficiency syndrome; **OR**: odds ratio; **aOR**: adjusted odds ratio; **HR**: hazard ratio; **aHR**: adjusted hazard ratio; **RR**: risk ratio; **aRR**: adjusted risk ratio; **ACF**: active case-finding; **PCF**: passive case-finding; **DOTS**: directly observed treatment short; **SAT**: self-administered treatment; **STD**: sexually transmitted diseases; **NTP**: national tuberculosis program; **Patient delay**: delay between symptom onset and presentation to health care; **Three types of provider/system-level delay**:\*: delay between presentation to ANY health care provider and diagnosis (health care provider includes but is not restricted to qualified specialist, primary physician, private practitioner, and traditional healer); #: delay between presentation to ANY health care provider and treatment (health care provider includes but is not restricted to qualified specialist, primary physician, private practitioner, and traditional healer); @: delay between diagnosis and treatment; **Two types of combined delay**:^: delay between symptom onset and treatment initiation; \$: delay between symptom onset and diagnosis

<sup>1</sup>Mesfin 2010 and Mesfin 2009 used same population;

<sup>2</sup>Atre 2009 and Atre 2004 used same population;

<sup>3</sup>Both studies by Yimer in 2009 used same population;

<sup>4</sup>Gosoni 2008, Somma 2008, and Weiss 2008 used same population in Bangladesh, India, and Malawi

**TableS1. Summary of included studies**

<sup>5</sup>Both studies by Wandwalo in 2000 used same population
